1 *Title*

2 **Degenerating *Drosophila* Larval Epidermal Cells Drive Thorax Closure**

3 *Running title*

4 Larval epidermis drives *Drosophila* thorax closure

5 *Keywords*

6 Thorax closure, Larval epidermis, Organogenesis, *Drosophila*

7 *Authors*

8 Thamarailingam Athilingam<sup>1,2,3</sup>, Saurabh Singh Parihar<sup>1,2</sup>, Rachita Bhattacharya<sup>1</sup>,  
9 Mohd. Suhail Rizvi<sup>1,4</sup>, Amit Kumar<sup>1,5</sup> and Pradip Sinha<sup>1,\*</sup>

10

11 <sup>1</sup>Department of Biological Sciences and Bioengineering  
12 Indian Institute of Technology Kanpur, India, 208016

13 <sup>2</sup>These authors contributed equally

14 <sup>3</sup>Current address: Mechanobiology Institute, National University of Singapore  
15 5A Engineering Drive 1, Singapore 117411  
16 [mbita@nus.edu.sg](mailto:mbita@nus.edu.sg)

17

18 <sup>4</sup>Current address: Indian Institute of Technology Hyderabad, India 502285  
19 [suhair@bme.iith.ac.in](mailto:suhair@bme.iith.ac.in)

20

21 <sup>5</sup>Current address: Albert Einstein College of Medicine, 1300 Morris Park Avenue  
22 Bronx, New York  
23 [amit.kumar@einsteinmed.org](mailto:amit.kumar@einsteinmed.org)

24

25 \*Author for correspondence:

26 [pradips@iitk.ac.in](mailto:pradips@iitk.ac.in)

## Larval epidermis drives *Drosophila* thorax closure

### 27 **Abstract**

28 Adult thorax formation in *Drosophila* begins during pre-pupal development by fusion of its two  
29 contralateral progenitor halves, the heminotal epithelia (HE). HEs migrate and replace an  
30 underlying cell layer of thoracic larval epidermal cells (LECs) during a morphogenetic process  
31 called thorax closure. The LEC layer has so far been proposed to be a passive substrate over  
32 which HEs migrate before their zipping. By contrast, here we show that the pull forces generated  
33 within the LEC layer drive HE migration. During thorax closure, the LECs display actomyosin-  
34 mediated contraction, via enrichment of non-muscle myosin-II and actin, besides squamous-to-  
35 pseudostratified columnar epithelial transition and tissue shrinkage. This shrinkage of the LEC  
36 layer is further accompanied by cell extrusion and death, that prevent overcrowding of LECs,  
37 thereby promoting further shrinkage. The pull forces thus generated by the shrinking LEC layer  
38 are then relayed to the HEs by their mutual adhesions via  $\beta$ PS1 (Mys) and  $\alpha$ PS3 (Scb) integrins.  
39 Suppression of cell death in the LEC layer by a gain of p35 leads to cell overcrowding, which  
40 impedes HE migration and zipping. Further, knockdown of *sqh*, the light chain of non-muscle  
41 myosin II, in LECs or integrins (*mys* or *scb*) in either the LEC layer or in the HEs, or both  
42 abrogate thorax closure. Mathematical modeling also reveals the biophysical underpinnings of  
43 the forces that drive this tissue closure process wherein a degenerating LEC layer mediates its  
44 succession by the future adult primordia. These essential principles of thorax closure appear  
45 ancient in origin and recur in multiple morphogenetic contexts and tissue repair.

### 46 **Introduction**

47 During larval-pupal molt in holometabolous insects, a high ecdysone hormone titer triggers the  
48 replacement of larval structures by their adult primordia (for a recent review, see (Truman and  
49 Riddiford, 2019)). Thorax closure in *Drosophila* exemplifies one such morphogenetic event  
50 where larval epidermal cells (LECs) of the three thoracic body segments are replaced by their  
51 corresponding adult primordia. Adult thorax (or notum) is formed from three paired imaginal  
52 progenitors: namely, dorsal prothoracic (humeral) discs, proximal cells of the mesothoracic wing  
53 discs, and the metathoracic haltere imaginal discs (for review, see (Beira and Paro, 2016;  
54 Fristrom and Fristrom, 1993)). These bilateral precursors of the adult thorax, following their  
55 eversion (Pastor-Pareja et al., 2004), undergo fusion with each other to form two contralateral

*Larval epidermis drives Drosophila thorax closure*

56 heminotal epithelia (HE), one each on the left and the right thoracic region of the prepupa.  
57 Thorax closure ensues (Fristrom and Fristrom, 1993) when these two opposing contralateral HEs  
58 migrate, replacing the LEC layer and zip at the future midline of the adult body: a culmination of  
59 an elegant process of epithelial tissue closure (see Figure S1A) (Agnès et al., 1999; Kumar et al.,  
60 2020; Martín-Blanco et al., 2000; Usui and Simpson, 2000; Zeitlinger and Bohmann, 1999).

61 Historically, studies on thorax closure (Agnès et al., 1999; Martín-Blanco et al., 2000; Usui and  
62 Simpson, 2000; Zeitlinger and Bohmann, 1999) closely followed the leads obtained from another  
63 epithelial tissue closure event in *Drosophila*: namely, embryonic dorsal closure (DC) (for review,  
64 see (Belacortu and Paricio, 2011)). Like in thorax closure, during DC too, two lateral embryonic  
65 epidermal cell sheets converge dorsally, replacing an extra-embryonic flattened epithelial cell  
66 layer, the amnioserosa (for recent reviews, see (Hayes and Solon, 2017; Kiehart et al., 2017)).  
67 Anatomical parallels could be drawn between the embryonic amnioserosa and the thoracic LEC  
68 layer as both degenerate and are replaced during their respective tissue closure events. Likewise,  
69 lateral embryonic epidermis and pre-pupal HEs represent the cell layers that migrate during DC  
70 and thorax closure, respectively. The leading edges (LEs) of the lateral embryonic epidermis  
71 have been proposed to mediate DC based on their supracellular actin cables via their purse-  
72 string-like contractions (Kiehart et al., 2000), while actin-rich filopodial projections from the  
73 LEs contribute to their zipping (Jacinto et al., 2002). Given these precedences in DC, previous  
74 studies in thorax closure also explored the LEs of HEs as potent hubs of mechano-regulation and  
75 cell signaling (for review see, (Belacortu and Paricio, 2011; Harden, 2002)). Indeed, it was seen  
76 that perturbations in signaling pathways such as JNK, D-Fos, or Dpp in the LEs, affect thorax  
77 closure, reminiscent of similar outcomes in DC (for review, see (Belacortu and Paricio, 2011;  
78 Harden, 2002; Martín-Blanco and Knust, 2001)). Further, LEs of HEs also displayed actin-rich  
79 filopodia (Agnès et al., 1999; Martín-Blanco et al., 2000; Pastor-Pareja et al., 2004; Usui and  
80 Simpson, 2000; Zeitlinger and Bohmann, 1999), that are known to display reversible contacts  
81 with substratum in various morphogenetic contexts (Parsons et al., 2010). It was therefore  
82 proposed that contralateral HEs crawl over the LEC layer, wherein the underlying LECs are left  
83 ‘below and behind and eventually delaminate from the edges’ (Martín-Blanco et al., 2000). In  
84 essence, these interpretations of thorax closure present the thoracic LEC layer as a scaffold over  
85 which HEs migrate (see Figure 6 in (Martín-Blanco et al., 2000)). Indeed, somewhat comparable

## *Larval epidermis drives Drosophila thorax closure*

86 roles LEs play in other organisms, such as gastrulation in sea urchin embryo (Gustafson, 1963),  
87 ventral enclosure in *C. elegans* (Williams-Masson et al., 1997), or closure of epithelial gaps  
88 during wound healing (Martin, 1997; Martin and Lewis, 1992) presented a framework wherein  
89 LEs of migrating HEs appeared as the drivers of thorax closure.

90 Subsequent studies on DC, however, led to a substantial revision in the understanding of its  
91 mechanism wherein amnioserosa—rather than the LEs of the lateral embryonic epidermis—was  
92 shown to be the principal source of forces for tissue closure. For instance, amnioserosa shrinks  
93 by apoptosis (Toyama et al., 2008) and displays non-muscle myosin II-dependent pulsed  
94 contractions (Franke et al., 2005; Solon et al., 2009), which collectively generate forces that  
95 drive migration of the lateral embryonic epidermis. Strikingly, more recent studies have shown  
96 that pull forces generated by the amnioserosa layer alone are sufficient to drive DC (Ducuing and  
97 Vincent, 2016; Pasakarnis et al., 2016), while supracellular actomyosin cables in the LEs of the  
98 lateral embryonic epidermis display ancillary roles in dorsal closure: such as maintenance of  
99 epithelial cell packing, tissue organization, and polarity (Ducuing and Vincent, 2016) besides  
100 aiding in scar-free zipping (Pasakarnis et al., 2016). In essence, these findings assign  
101 degenerating amnioserosa as the major force-generating tissue during DC (for review, see  
102 (Hayes and Solon, 2017; Kiehart et al., 2017)).

103 In the light of these emergent understandings of DC, here we have re-examined the roles of a  
104 degenerating LEC layer in thorax closure. We show that non-muscle myosin II-mediated  
105 contractions along with cell extrusions and cell death in the LEC layer, generate the pull forces  
106 that are then relayed to the flanking HEs due to their integrin-based adhesions. Our mathematical  
107 modeling further formalizes these biophysical principles underlying LECs-driven tissue closure  
108 event, wherein a degenerating, yet dynamic LEC layer drives its succession by the future adult  
109 primordia.

## 110 **Results**

### 111 *Progressive shrinkage of the LEC layer during thorax closure*

112 In *Drosophila*, thorax closure sets in at an early stage of pupal development—often referred to as  
113 ‘pre-pupal’ stage (0-12 hrs after puparium formation (APF) (Fristrom and Fristrom, 1993))—that

*Larval epidermis drives Drosophila thorax closure*

114 lasts from 4.30 to 6.00 hrs APF at 25°C (Kumar et al., 2020; Martín-Blanco et al., 2000; Usui  
115 and Simpson, 2000; Zeitlinger and Bohmann, 1999). Leading-edge (LE) cells of the contralateral  
116 HEs—which are seen in close apposition with the underlying LEC layer (Martín-Blanco et al.,  
117 2000; Pastor-Pareja et al., 2004; Usui and Simpson, 2000)—display upregulated expression of a  
118 JNK reporter, *pu<sub>1</sub>-lacZ* (Figure 1A, A'), besides actin-enriched filopodial and lamellipodial  
119 protrusions (red and blue arrows, respectively, Figure 1A').

120 We first re-examined the LEC layer and HE movements and dynamics during thorax closure by  
121 live-cell imaging. Nuclei of LECs were selectively marked (*A58>nu-DsRed*, also see Figure  
122 S1D) (Anderson and Galko, 2014; Galko and Krasnow, 2004) along with Spider-GFP—reporter  
123 for *gish* gene (Morin et al., 2001)—which marks the cell boundaries of both HEs and LECs  
124 (Morin et al., 2001) (left panel in Video 1, Figure 1B). We noticed a progressive shrinkage of  
125 LEC layer perimeter (left and right panel in Video 1, Figure 1B, and red outlines in Figure 1C)—  
126 coincident with the progression of migrating LEs of the contralateral HEs (left panel in Video 1,  
127 Figure 1B and green outlines in Figure 1C); with LEC layer displaying a comparable rate of  
128 shrinkage ( $4.1 \pm 0.77 \mu\text{m}/\text{min}$ , Figure 1C) to that of HEs migration ( $4.3 \pm 0.46 \mu\text{m}/\text{min}$  for HE,  
129 Figure 1C). This shrinkage in the LEC layer results in a precipitous drop in its surface area  
130 during thorax closure (4:30 to 6:00 hrs APF, Figure 1D) besides nearly a two-fold increase in its  
131 cell density, as seen from nuclear counts in its medial region (Figure 1E, see representative boxes  
132 1-3 in Figure 1B).

133 Trajectories of LECs migration—visualized by tracking their nuclear displacements (right panel  
134 in Video 1) revealed spatio-temporal characteristics: initial trajectories are aligned along the  
135 anterior-to-posterior (A→P) body axis (between 0-4 hrs APF; right panel in Video 1, Figure 1F):  
136 that is, when thoracic LECs display apolysis or detachment from the overlaying pupal cuticle  
137 (Usui and Simpson, 2000) while later, during thorax closure proper, these trajectories were seen  
138 along the L→M axis (4:30-6:00 hrs APF; right panel in Video 1, Figure 1G), parallel to the  
139 direction of HEs migration (left panel in Video 1; Figure 1B).

140 Cryo-cross sections along the second thoracic pupal segment (T2) further revealed that LEs of  
141 HEs remain in contact with the lateral edges of the LEC layer (Figure 1H-I) (also see (Usui and  
142 Simpson, 2000)). Further, we noticed a transition of the LEC layer from flattened squamous

*Larval epidermis drives Drosophila thorax closure*

143 cells, with widely-spaced nuclei aligned in a single plane (4:30 hrs APF, red nuclei in Figure 1H)  
144 to densely packed tall columnar cells wherein nuclei are seen at different planes along their  
145 dorso-ventral axis (5.30 hrs APF, red nuclei in Figure 1I), revealing their transition to a pseudo-  
146 stratified state (also see (Norden, 2017)). Moreover, at later stages, LECs were also seen to be  
147 extruded from the layer (yellow stars in Figure 1I). Confocal microscopic optical X-Z sections of  
148 the LEC layer further confirmed an increase in its cell packaging density (Figure 1K compared to  
149 1J), increased cell heights (Figure 1K, L) with accompanying pseudo-stratification (Figure 1K),  
150 and, finally, cell extrusion (yellow stars, Figure 1K) during thorax closure.

151 Together, these observations reveal a host of novel features of epithelial dynamics in the LEC  
152 layer, which present a compelling argument for a possible link for its active role in thorax  
153 closure (Figure 1M).

154 ***Delamination and cell death in the LEC layer facilitate unimpeded HE migration and zipping***

155 Programmed cell death (PCD) is a key event in early embryonic development in both  
156 invertebrates and vertebrates (for reviews, see (Nagata, 2018; Singh et al., 2019; Suzanne and  
157 Steller, 2013; Teng and Toyama, 2011)). For instance, during DC, PCD in the amnioserosa  
158 contributes to generating pull forces that drive tissue closure (Teng and Toyama, 2011; Toyama  
159 et al., 2008). Likewise, elimination of abdominal LECs by apoptosis prefigures the expansion of  
160 histoblast nests (Ninov et al., 2007; Teng and Toyama, 2011) via a ‘push-pull coordination’ with  
161 the latter (Prat-Rojo et al., 2020). It is therefore conceivable that delamination in LECs (Figure  
162 1I, K) and their eventual loss by apoptosis (Ninov et al., 2007) could also be crucial for thorax  
163 closure by removing the impediment of cell crowding on the path of migrating HEs.

164 A careful examination of Spider-GFP marked LECs (Figure S2A) revealed their shrinking  
165 perimeters (yellow arrows, Figure S2A’) while their live imaging using Lachesin-GFP—a  
166 septate junction protein reporter (Morin et al., 2001)—further revealed progressive apical  
167 constrictions (yellow and red arrows in Video 2 and Figure 2A) and delamination (Figure S2B).  
168 Previously, it has been shown that delaminating cells often display apoptosis, marked by caspase  
169 activation (Muliylil et al., 2011; Saias et al., 2015; Teng et al., 2017). Indeed, an Apoliner  
170 construct—a genetically encoded caspase sensor and an early apoptotic marker (Bardet et al.,  
171 2008)—revealed early caspase activation in the majority of LECs (Figure S2C), which reconciles

## *Larval epidermis drives Drosophila thorax closure*

172 well with the fact that most LECs are delaminated (Figure S2D), leading to their elimination by  
173 cell death.

174 To further probe the role of cell death in the LEC layer, we examined the consequences of gain  
175 of p35—an inhibitor of caspase-3-like proteins in *Drosophila* (Hay et al., 1994)—by selectively  
176 driving *UAS-p35* transgene under the *A58-Gal4* driver (Figure S1D). Comparison of the endpoint  
177 of thorax closure, as revealed by X-Y (upper panel, Figure 2B) and X-Z optical sections (lower  
178 panel, Figure 2B), at 6:00 hrs APF for the control (*A58>GFP*, Figure 2B) and in case of *p35*  
179 overexpression (*A58>GFP; p35*, Figure 2B) revealed cell overcrowding (yellow star, Figure 2B,  
180 lower panel) in the latter with an accompanying impediment in HE fusion, as seen from their  
181 failed zipping and persistence of large inter-HE gap (arrowheads in Figure 2B, lower panel). Not  
182 surprisingly, adults emerging out of these pupae displayed a characteristic cleft-thorax phenotype  
183 (arrowhead, Figure 2C) besides the persistence of non-extruded LECs in the freshly eclosed  
184 adults (arrowhead, GFP, Figure 2C) and prolongation of the duration of thorax closure (Figure  
185 2D). Similar overcrowding and failure in HE fusion can also be seen in the case of *p35*  
186 overexpression both in HEs and LECs (Figure S3A) using the *pnr-Gal4* driver (Figure S1B).  
187 These adults also displayed the characteristic cleft-thorax phenotype (arrowhead in the upper  
188 panel of Figure S3B) and persistence of non-extruded LECs in freshly eclosed adults (arrowhead  
189 in the lower panel of Figure S3B), besides prolonging the duration of thorax closure (Figure  
190 S3C). By contrast, a selective overexpression of *p35* in only the HEs, using *332.3Gal80; pnr-*  
191 *Gal4* (see Figure S2D) did not affect thorax closure (Figure S3D).

192 Together, these results reveal that cell death in the LEC layer aid in its shrinkage, help reduce  
193 overcrowding of LECs and, facilitate HE migration and fusion during thorax closure (Figure 2E).

### 194 ***Non-muscle myosin-II-mediated contraction in LEC layer drives migration of HEs***

195 Given the possible active contraction (Video 2, Figure 2A) and overall shrinkage in the LEC  
196 layer (Video 1, Figure 1), it is likely that during thorax closure it can generate pull forces that  
197 facilitate HE migration. To test this possibility, we first ablated the LEC layer using a short pulse  
198 of the laser during thorax closure and visualized the fallouts (red arrow in Video 3). Indeed,  
199 ablation of the LEC layer during thorax closure brings HE migration to a halt, which then  
200 recedes away (red stars in Figure 3B compared to 3A, Video 3 compared to left panel in Video

*Larval epidermis drives Drosophila thorax closure*

201 4) as seen from a rapid increase in their inter-HE distance (red stars, Figure 3B and C). This  
202 fallout of the laser ablation in the LEC layer, therefore, suggests that the LEC layer is under  
203 tension and can generate pull forces. Conversely, it may also be argued that laser ablation  
204 disrupts the LEC layer, thereby disrupting the scaffold over which contralateral HE migrates  
205 (Martín-Blanco and Knust, 2001; Martín-Blanco et al., 2000).

206 To distinguish between the two alternative roles of the degenerating thoracic LEC layer during  
207 thorax closure: namely, its role as a passive scaffold versus active contractile force generator, we  
208 further asked if, like the contractile amnioserosa cells (Franke et al., 2005; Young et al., 1993),  
209 LECs, too, display non-muscle myosin II-dependent contractions. We examined the expression  
210 of the regulatory light chain of non-muscle myosin II, *spaghetti squash* (*sqh*)—based on its GFP  
211 reporter, Sqh-GFP (Sisson et al., 2000)—during the thorax closure. Sqh regulates non-muscle  
212 myosin II contractile functions via its phosphorylation (Vereshchagina et al., 2004). We noticed  
213 an elevated Sqh-GFP level in LECs (Figure 3D-D'') and also in the LEs of the contralateral HE  
214 (Figure 3D), reminiscent of the domains of expression of Zip/Myo-II in analogous cell types in  
215 the embryonic dorsal closure: that is, amnioserosa and the LE of the lateral epidermal layer,  
216 respectively (Franke et al., 2005). LECs also displayed enrichment of actin, which co-localized  
217 with Sqh-GFP on the cell edges and also in their cytoplasm (Figure 3D-D''') (Franke et al., 2005;  
218 Gorfinkiel, 2016).

219 To assess the functional relevance of Sqh enrichment in the LEC layer during thorax closure, we  
220 knocked down *sqh* simultaneously in both the LEC layer and the HE (Figure S1B) (left panel in  
221 Video 5 compared to left panel in Video 4), selectively in only the LEC layer (Figure S1D)  
222 (middle panels in Video 5 compared to the middle panel in Video 4) or in the HE (Figure S2C)  
223 (right panel in Video 5 compared to the right panel in Video 4). We noticed a failure in thorax  
224 closure when the *sqh*-knockdown spanned the LEC layer (double arrow in left and middle panel  
225 in Video 5, Figure 3E and 3F). Quantification of the inter-HE distances at various time intervals  
226 of thorax closure following *sqh* knockdown in the LECs or both in LECs and HEs, further  
227 revealed persistent gaps and failed closure (red and blue bars in Figure 3H). We also note that  
228 knockdown of *sqh* in HEs does not have much impact on thorax closure (right panel in Video 5,  
229 Figure 3G and green bars in Figure 3H), reminiscent of the possible redundant role of LEs in DC  
230 ((Franke et al., 2005) for review see (Kiehart et al., 2017)).



*Larval epidermis drives Drosophila thorax closure*

231 Thus, during thorax closure, as in DC, pull forces generated by non-muscle myosin II from the  
232 LECs drive the HE migration, which is reminiscent of the role played by amnioserosa during  
233 dorsal closure (for review, see (Kiehart et al., 2017)).

234 ***Pull forces from the LEC layer are relayed to the contralateral HE via their integrin-based***  
235 ***adhesion***

236 Adhesion between two apposed cell layers can impact their respective morphogenesis and  
237 mechano-transduction (Sun et al., 2016). Such inter-tissue adhesions are often mediated by the  
238 members of the integrin family, comprising of  $\alpha$  and  $\beta$  subunits of position-specific (PS)  
239 integrins (Narasimha and Brown, 2013). For instance, during embryonic DC, the lateral  
240 embryonic epidermal layers adhere to the centrally placed amnioserosa via enrichment of  $\beta$ PS1  
241 (Myospheroid, Mys) and  $\alpha$ PS3 (Scab, Scb) dimers at their tissue interfaces, thereby facilitating  
242 relay of forces between these two cell layers (Narasimha and Brown, 2004).

243 We thus examined the fallouts of knockdowns of integrins during thorax closure. *Drosophila*  
244 genome encodes 2 $\beta$  ( $\beta$ PS1 and  $\beta$ v) and 5 $\alpha$  ( $\alpha$ PS1-5) subunits of integrins that form multiple  
245 versions of heterodimeric ( $\alpha\beta$ ) integrin complexes in different contexts of embryonic and adult  
246 development (Narasimha and Brown, 2004; Narasimha and Brown, 2013). Individual  
247 knockdowns using RNAi constructs of 2 $\beta$  and 4 $\alpha$  ( $\alpha$ PS1-4) integrins in both HE and LECs  
248 (Figure S1B) showed very high pupal lethality upon *mys* ( $\beta$ -PS1) or *scb* ( $\alpha$ -PS3) knockdown,  
249 suggesting their possible involvement in thorax closure (Figure S4A) while rest eclosed as adults  
250 without thorax closure defect (Figure S4A).

251 A Mys-GFP reporter further revealed Mys enrichment at the HE-LEC layer contact points  
252 (Figure 4A-B) besides their enrichment at apico-lateral cell edges in both tissues (Figure 4B', B''  
253 and their Y-Z optical sections). Further, knockdown of *mys* in both HE and LEC layer (see  
254 Figure S1B) or only the LEC layer (see Figure S1C) disrupted the process of thorax closure  
255 (double-headed arrow in left and middle panel in Video 6), culminating from the loss of LEC-HE  
256 contacts, besides the loss of LEC layer integrity, as seen from the loss of cell-cell contacts  
257 (yellow arrows in left and middle panel in Video 6, Figure 4C, D). By contrast, selective  
258 knockdown of *mys* only in the HE was marked by a characteristic snapping of the HE during the  
259 migration process from the LEC layer and culminating in a failed zipping of HEs (red arrow in

## *Larval epidermis drives Drosophila thorax closure*

260 the right panel of Video 6) besides detachment of the two cell layers (Figure 4E). These extreme  
261 phenotypic consequences of *mys* loss precluded adult emergence (Figure S4A). We thus  
262 compromised Gal4 expression by raising the larval cultures at a lower growth temperature  
263 (18°C) (see Material and Methods) (Duffy, 2002), which results in the eclosion of adults from  
264 ~30% of these pupae, which invariably displayed cleft-thorax phenotype (Figure 4F-I).  
265 Additionally, live imaging from knockdown of *scb* in both LECs and HEs (Figure S4B) or LECs  
266 alone (Figure S4C), too, revealed an arrest of HE migration and loss of LEC layer integrity—like  
267 those seen following *mys* knockdown (Figure 4C-D). It is, therefore, likely that  $\beta$ PS1 (Mys) and  
268  $\alpha$ PS3 (Scb)—presumably as heterodimeric partners (Narasimha and Brown, 2004; Narasimha  
269 and Brown, 2013)—maintain LEC-HE adhesion—which is essential for the relay of pull forces  
270 from the LEC layer to HE.

### 271 *Epithelial dynamics in the LEC underlies thorax closure – an in-silico analysis*

272 To test the biophysical underpinnings of this emergent mechanism of thorax closure, we utilized  
273 a two-dimensional vertex model of the LEC layer along with two flanking contralateral HEs. The  
274 vertex models have been utilized extensively to study epithelial mechanics in several  
275 developmental contexts, such as oriented cell divisions (Mao et al., 2011), density-independent  
276 phase transitions (Bi et al., 2015), epithelial topology (Aegerter-Wilmsen et al., 2010), cell flows  
277 during epithelial morphogenesis (Aigouy et al., 2010), cell size oscillations (Lin et al., 2017) or  
278 cell-cell adhesion mediated cell size dynamics (Kumar et al., 2020). In our vertex model, the  
279 mechanical response of the cells (LECs as well as HEs) is characterized by an energy function  
280 (Figure 5A) comprising of contributions from cell elasticity arising due to impermeability, or  
281 absence of leakiness of cell membrane, actomyosin-driven cell contractility and cadherin or  
282 integrin (at the interface of LEC layer and HE) mediated cell-cell adhesion (Farhadifar et al.,  
283 2007; Kumar et al., 2020). For overdamped cellular dynamics, the velocities of vertices are taken  
284 as proportional to the forces which are calculated from derivative of the energy functional  
285 relative to the vertex positions (Figure 5A, see Materials and methods).

286 The numerical simulation of the vertex model of LEC and HE recapitulates the experimental  
287 observations, as shown (first panel in Video 7, Figure 5B). Starting from irregular cell geometries  
288 in the LEC layer, cells are seen to elongate along the L→M direction due to higher drag offered

## *Larval epidermis drives Drosophila thorax closure*

289 by the HE (Figure 5B), reminiscent of such transitions seen *in vivo*. Further, in the absence of  
290 active forces, mediated by Sqh and delamination, in the LECs *in vivo* resulted in arrested thorax  
291 closure (second and third panel in Video 7, Figure 5C and 5D). Finally, lowering of cell contacts  
292 between LECs and HEs—representing the fallout of *in vivo* knockdown of integrins in HE-  
293 specific manner (see Figure S1C) (fourth panel in Video 7)—arrested HE migration and thorax  
294 closure (Figure 5E). These findings from vertex simulation, therefore, further reaffirm that LEC  
295 delamination and contraction-mediated pull forces relayed to HE are essential biophysical  
296 principles of thorax closure.

### 297 **Discussion**

298 A comparison between embryonic DC and pupal thorax closure reveals uncanny parallels  
299 between their respective LEs: both leading their respective epithelia all the way to migrate over a  
300 degenerating cell layer of a preceding developmental stage (Belacortu and Paricio, 2011;  
301 Zeitlinger and Bohmann, 1999). Given the primary importance assigned earlier to the LEs for the  
302 migration of embryonic lateral epidermis during DC (Kiehart et al., 2000), it may appear  
303 reasonable to assume LEs as a force-generator during thorax closure (Martín-Blanco et al.,  
304 2000). Instead, our results reveal that it is the LEC layer generated pull forces that are necessary  
305 during the thorax closure. During thorax closure, the LEC layer displays elaborate orchestration  
306 of epithelial dynamics marked by squamous-to-pseudostratified columnar transition and  
307 accompanying the non-muscle myosin-II-mediated contractions, cell extrusion and cell death.  
308 Pull forces, thus generated in the shrinking LEC layer, are then relayed to the flanking HEs via  
309 their mutual integrin-based adhesions (Figure 6). From the biomechanical viewpoint, too, our  
310 simplified two-dimensional vertex model formalizes these essential elements of the LEC layer in  
311 thorax closure: namely, their cell delamination, non-muscle myosin-II driven contractions and  
312 finally its integrin-based adhesion with HEs (Figure 5). In essence, therefore, reminiscent of  
313 embryonic amnioserosa ((Ducuing and Vincent, 2016; Pasakarnis et al., 2016) for review see,  
314 (Hayes and Solon, 2017; Kiehart et al., 2017)), the degenerating thoracic LEC layer, too,  
315 generates the forces required to drive its replacement by successors—the HEs.

### 316 ***LEC generates the pull forces for HE migration***

*Larval epidermis drives Drosophila thorax closure*

317 Our results reveal two core attributes of the LEC layer, which underlie HE migration. The first  
318 attribute is its non-muscle myosin II-mediated contractions. It is conceivable that actomyosin-  
319 mediated contraction of the LECs, too, contribute to their cell shape remodeling, reminiscent of  
320 other morphogenetic processes, such as gastrulation, oogenesis, and intercalation during  
321 germband elongation (for review, see (Heisenberg and Bellaïche, 2013)). For instance, deep  
322 tissue imaging of *Drosophila* gastrulation reveals that apical actomyosin meshwork drives apical  
323 contraction in the ventral furrow cells leading to cell lengthening and basal movement of the  
324 nuclei: the net fallout being volume conservation within a constrained space (Gelbart et al., 2012;  
325 Khan et al., 2014). During thorax closure, too, the LECs display apical contractions (see Video 2,  
326 Figure 2A) and cell elongation (Figure 1I and K-L)—accompanying their squamous-to-columnar  
327 epithelial transition—which could also mean their volume conservation during cell shape  
328 remodeling (for review (Gorfinkiel, 2016)). Further, the apical enrichment of actin and Sqh  
329 (Figure 3D-D''') in the LEC layer during thorax closure not only generates pull forces but could  
330 as well be responsible for an increase in cell density. A consequent cell overcrowding in the LEC  
331 layer on the other hand is offset by cell extrusion and cell death (Figure 6). This essential  
332 attribute of the LECs are also seen in amnioserosa during DC, marked by cell extrusions  
333 (ingression) via apoptosis ((Toyama et al., 2008) for review, see (Ambrosini et al., 2017; Kiehart  
334 et al., 2017; Teng and Toyama, 2011)). In other migrating epithelia, too, such as the HEs, cell  
335 overcrowding-mediated cell extrusion alleviate space constraint, leading to restoration of cell  
336 number homeostasis ((Levayer et al., 2016; Marinari et al., 2012) for review, see (Ambrosini et  
337 al., 2017; Fadul and Rosenblatt, 2018)).

338 The second core attribute of the LEC layer is its integrin-based adhesion with the flanking HEs  
339 that allow relay of the pull forces to the latter (Figure 6). This scenario, too, appears to recur in  
340 multiple contexts of animal development, including DC in *Drosophila* embryogenesis (Mulyil et  
341 al., 2011; Narasimha and Brown, 2004) or in mouse embryos wherein surface ectoderm  
342 connecting contralateral neuroepithelium—the precursor to the neural tube—display enriched  
343 levels of integrin  $\beta 1$  subunit apically (Molè et al., 2020).

344 ***Thorax closure: an archetypal mechanism for tissue or wound closure***

## *Larval epidermis drives Drosophila thorax closure*

345 One of the enduring revelations of various tissue closure mechanisms during development or  
346 tissue repair is the critical role of the cell death in the degenerating cell layer. For instance,  
347 during wound healing, injured and dying cells send out a signal—both humoral (cytokine) and  
348 mechano-stimuli—to the surrounding healthy cells to migrate and proliferate and thereby leading  
349 to their replacement (for review, see (Eming et al., 2007; Gurtner et al., 2008; Martin, 1997;  
350 Shaw and Martin, 2009)). For instance, a wounded site is marked by aggregation of  
351 myofibroblasts, which represent transformed fibroblasts (Alberts et al., 2002) or are derived from  
352 epithelial cells through EMT (Yang and Liu, 2001). These are enriched in stress fibers and thus  
353 generate contractile forces to bring the wound edges closer. Upon wound healing, myofibroblasts  
354 are eliminated by apoptosis (Darby et al., 2014; Li and Wang, 2011). LECs, too, display  
355 functional parallels with myofibroblasts at wound sites. For instance, while these LECs remain  
356 dormant during larval life, their secretory activities are heightened upon pupariation and secrete  
357 of pre-pupal cuticle (Fristrom and Fristrom, 1993). Further, reminiscent of fibroblasts-to-  
358 myofibroblasts transition upon tissue injury, abdominal LECs, too, display EMT-like transition  
359 marked by filopodial and lamellipodial protrusions (Arata et al., 2017; Bischoff, 2012). These  
360 uncanny parallels between LECs *in situ* during thorax closure and the myofibroblasts, which  
361 migrate at the site of tissue closure, further show that the principles of thorax closure revealed  
362 here are primitive, presumably predating the emergence of holometabolous insects, and have  
363 been co-opted for multiple contexts of developmentally regulated tissue closure and repair  
364 events.

## 365 **Materials and Methods**

### 366 *Fly stocks and rearing conditions*

367 Stocks used in this study include:

368 **Gal4 lines:** *pnr-Gal4* (Chr. III) (Calleja et al., 2000) and *A58-Gal4* (Chr. III) (Galko and  
369 Krasnow, 2004).

370 **Gal80 lines:** *332.3Gal80* (Chr. II) (Pasakarnis et al., 2016).

371 **UAS-based reporter lines:** *UAS-(nls)GFP* (Chr. III) (BDSC #4776), *UAS-nuDsRed* (Chr. III)  
372 (Galko and Krasnow, 2004), and *UAS-Apoliner* (Chr. II) (BDSC #321122) (Bardet et al., 2008).

*Larval epidermis drives Drosophila thorax closure*

373 **UAS-overexpression lines:** *UAS-p35* (Chr. X) (BDSC #6298).

374 **UAS-knockdown lines:** *UAS-sqh-RNAi* (Chr. III) (BDSC #33892), *UAS-Itgbn-RNAi* ( $\beta v$ ) (Chr.  
375 III) (BDSC #28601), *UAS-mys-RNAi* ( $\beta PS$ ) (Chr. III) (BDSC #27735), *UAS-mew-RNAi*  
376 ( $\square PS1$ )(Chr. III) (BDSC #27543), *UAS-if-RNAi* ( $\square PS2$ ) (Chr. III) (BDSC #27544), *UAS-scb-*  
377 *RNAi* ( $\alpha PS3$ ) (Chr. III) (BDSC #27545), and *UAS-ItgaPS4-RNAi* ( $\alpha PS4$ ) (Chr. III) (BDSC  
378 #28535).

379 **Reporter lines:** *puc-LacZ<sup>E69</sup>* (Chr. III) (Martín-Blanco et al., 1998), *mys-GFP* (Chr. X)  
380 (Klapholz et al., 2015), *sqh-GFP* (Chr. II) (BDSC # 57145), *lac-GFP* (BDSC #6833) (Morin et  
381 al., 2001) and *spider-GFP* (Chr. III) (BDSC #59025) (Morin et al., 2001).

382 All fly cultures, unless mentioned otherwise, were grown at  $25\pm 1^\circ\text{C}$  on standard fly food.  
383 Knockdown or overexpression-based studies were performed on  $25\pm 1^\circ\text{C}$ . For *mys* adult studies,  
384 second-instar larvae were transferred to  $18^\circ\text{C}$  to decrease Gal4 activity (Duffy, 2002) and rescue  
385 high pupal lethality.

386 ***Staging, dissection, and immunostaining of pupal HE***

387 0 hrs APF pupae were carefully selected and dissected at desired time points, as described  
388 previously (Kumar et al., 2020). In brief, dissection was performed and fixed in 4% PF in 1X  
389 PBST followed by 1X PBST washes and antibody staining. Primary antibody and their dilutions  
390 used were: anti-Lgl (1:50) (Gift from Fumio Matsazaki) and  $\beta$ -galactosidase (1:200) (raised in  
391 mouse; Sigma Aldrich, Catalog No: G8021). Secondary antibodies used were tagged with Alexa  
392 488, 555, or 633 (Molecular Probes). Phalloidin (488, 555 or 633) and ToPro (555 or 633) were  
393 used to mark F-actin filaments and nucleus, respectively. Final mounting was done in  
394 Vectashield (H-1000, Molecular Probe) using a bridge slide.

395 ***Pupal cryo-cross section preparations***

396 For the pupal cryosections, staged samples were fixed overnight with 4% PF in 1X PBS at  $4^\circ\text{C}$   
397 followed by washing in 0.1% PBST and treatment with graded sucrose (10, 20, and finally in  
398 30%). Later, the samples were treated in an OCT (Leica Biosystems, Product No. 3801480) and  
399 30% sucrose media (1:1) before final mounting in the OCT followed by freezing. 15  $\mu\text{m}$  thick

## *Larval epidermis drives Drosophila thorax closure*

400 sections were cut using Leica cryotome, counterstained, and mounted in lysine coated glass  
401 slides.

### 402 ***Image acquisition and processing***

403 For whole-mount and cryosection preparations, confocal images were acquired using the Leica  
404 SP5 laser scanning confocal microscope. Pupal (still and time-lapse) and adult imaging were  
405 performed using Leica M205FA or Zeiss AxioZoom V1.6 microscope on either bright field or  
406 GFP filters. Images were processed using LAS 4.0, ImageJ software, and Adobe Photoshop CS6,  
407 whichever relevant.

### 408 ***Laser ablation in LEC layer***

409 A modified FRAP protocol was used in a tunable infrared laser attached to Leica multiphoton  
410 SP8 confocal microscope to ablate the LEC layer. Initially, the staged pupae (4:30 hrs APF) was  
411 imaged for 30 mins (30 seconds per frame) to reach 5 hrs APF and shifted to FRAP conditions  
412 where 100% laser at 900 nm was focused in a narrow rectangular ROI (red box, Figure 3B) on  
413 the LEC layer for 60 secs and imaged again in normal conditions for 15 mins (30 sec per frame)  
414 (Video 3).

### 415 ***Calculation of inter-HE distance***

416 Inter-HE distances during various perturbations was calculated based on measuring the L→L  
417 distance between migrating leading edges of the HE. The graph was then plotted in GraphPad  
418 8.0.

### 419 ***Quantification of various LEC layer parameters***

#### 420 ***LEC surface area:***

421 For the measurement of the LEC layer surface area over time, outlines were manually drawn  
422 along the perimeter of the LEC layer with Nu-DsRed marked nucleus (*A58>nu-DsRed*) on  
423 selected time-lapse images during thorax closure. The surface areas were then measured using  
424 ImageJ software.

## *Larval epidermis drives Drosophila thorax closure*

### 425 ***LEC nucleus number:***

426 For counting the nuclear number in the LEC layer, live imaging video of Nu-DsRed marked  
427 nuclei (*A58>Nu-dsRed*) (right panel in Video 1) was used, and nuclei numbers were counted  
428 using the particle analyzer tool in ImageJ.

### 429 ***LEC layer crowding:***

430 Three boxes of equal size were placed in the medial LEC layer (Box 1 and 2 on T2 and Box 3 in  
431 T3 segments), followed by manual counting and plotting in Excel.

### 432 ***LEC nuclear migration:***

433 Each frame of the right panel in Video 1 with *A58>Nu-dsRed* stained nuclei was smoothed  
434 using a Gaussian filter followed by image thresholding. The location of each nucleus in each  
435 frame was subsequently detected by finding the local maxima in the image with skimage Python  
436 library. For movie frames corresponding to 0-4 hrs APF and 4-6 hrs APF, the location of the  
437 nucleus was plotted using scatter plots, in blue and green colors, respectively.

### 438 ***LEC layer thickness:***

439 Y-Z sections were used to calculate the thickness of the LEC layer (*pnr>GFP*) of pupae at two  
440 different time points, before and during thorax closure. Image analysis was performed on LAS-X  
441 software followed by their plotting on GraphPad Prism 8.0.

### 442 ***Mathematical model:***

#### 443 *Introduction to vertex model of epithelium*

444 Vertex modeling is a handy tool for the study of the biophysical mechanisms in the epithelial  
445 tissues, which is a three-dimensional structure, by the representation of apical cross-sections of  
446 the cells with an assumption that the cell geometry does not change as one moves from the apical  
447 to the basal end of a cell. Vertex modeling permits the testing of the essential elements of the  
448 LEC dynamics and its relay to the HE in a highly simplified version posed side by side (Bi et al.,  
449 2015; Farhadifar et al., 2007; Kumar et al., 2020). Further, the epithelial dynamics has been



*Larval epidermis drives Drosophila thorax closure*

450 considered in the vertex model to be intrinsically regulated based on the features embedded in  
451 itself, and thus do not factor the precise trajectories of LEC shrinkage displayed by LEC apolysis  
452 and during the thorax closure proper (see Figure 1). Further, confluent LEC and heminota in a  
453 monolayer in our vertex model is not an exact representation of these tissue alignments seen *in*  
454 *vivo*, where these are seen in different planes. Furthermore, the two-dimensional vertex-based  
455 representation also does not consider the contributions other than that of LEC and HE cells, such  
456 as thorax geometry, the effect of the larval segment boundaries, or even the activity of the  
457 muscular layer underlying the LEC layer. These simplifications notwithstanding, vertex  
458 modeling allows substantial resolution of the biophysical underpinning of the LEC dynamic and  
459 its fallout on the HEs.

460 In this reduced two-dimensional framework, the mechanics of an epithelial monolayer is  
461 described by the energy functional:

$$E(\mathbf{R}_i) = \sum_{\alpha} \frac{K_{\alpha}}{2} (A - A_{\alpha})^2 + \sum_{\alpha} \frac{\Gamma_{\alpha}}{2} L_{\alpha}^2 + \sum_{\alpha, \beta} \Lambda_{\alpha, \beta} l_{\alpha, \beta} \quad (1)$$

$$\mathbf{f}_{\alpha}(\alpha, \mathbf{R}_i) = g(M(\alpha)) \mathbf{n}(\mathbf{R}_i) \quad (2)$$

462 where  $K_{\alpha}$  represents the modulus of area elasticity for cell-  $\alpha$ , which is, in this context, a  
463 combined manifestation of the incompressibility of cytoplasm and impermeability of the cell  
464 membrane,  $\Lambda_{\alpha, \beta}$  incorporates the cadherin dependent cell-cell adhesion at the edge shared  
465 between two adjacent cells  $\alpha$  and  $\beta$ , and, finally,  $\Gamma_{\alpha}$  stands for cell contractility arising due to the  
466 actomyosin network near the apical end of the cell. Following the approach proposed earlier, we  
467 can non-dimensionalize the adhesion parameter and contractility by  $K_{\alpha} A_0^{3/2}$  and  $K_{\alpha} A_0$ ,  
468 respectively (Farhadifar et al., 2007).

469 From the energy functional, one can calculate the force acting on each vertex by taking the  
470 functional derivative of the above equation for the vertex coordinates. Under the assumption of  
471 overdamped dynamics, the velocity of each vertex is proportional to the total force acting on it.

472 *T1 transition:* In addition to the vertex movements due to the forces acting on it, in this model T1  
473 transition is also taken into account where a collective of four cells exchange some of their

## Larval epidermis drives *Drosophila* thorax closure

474 neighbors (see Figure M1A). The T1 transition occurs whenever the edge, shared between any  
475 two cells, becomes smaller than a pre-specified threshold value.

476 *T2 transition*: Further, whenever the two-dimensional apical cross-section of a cell becomes  
477 smaller than a pre-specified threshold value, the cell is considered to get detached from the  
478 epithelial monolayer (see Figure M1A). It can be understood by the fact that a minimal cell in the  
479 vertex model, which is a two-dimensional representation of apical end only, implies that most of  
480 its contents are already out of the plane of the tissue, and the cell is destined to get delaminated  
481 from the tissue. This process is known as the T2 transition.

482 With this description of the basic vertex model (without any tissue-specific ingredients) in the  
483 following, we will describe the tissue-specific model considerations.

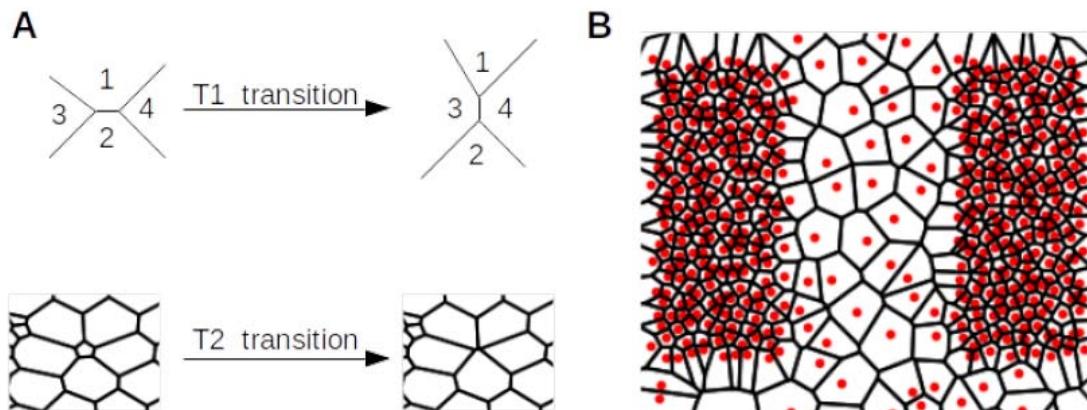

484 **Figure M1:** (A) Schematic depicting T1 and T2 transitions. (B) The generation of initial cell  
485 configurations for the LEC layer and HE. The red dots denote the initial seeds for the Voronoi  
486 tessellation with sparse and dense red dots representing LEC and HE, respectively.

### 487 *Initial cell geometry generation*

488 For the study of the LEC dynamics, we utilize the same framework while considering both of the  
489 LEC and two flanking contralateral HEs. It is worth recalling here that even though both the  
490 tissues are epithelial, their detailed descriptions differ significantly since LECs are of squamous  
491 characteristics (large apical section), and HE cells are of columnar type (smaller apical section).  
492 To generate a monolayer of LEC with HE for the vertex model, we use Voronoi tessellation with

*Larval epidermis drives Drosophila thorax closure*

493 the seed points with higher and lower densities in the HE and LEC regions, respectively (see  
494 Figure M1B).

495 *Vertex model for HE*

496 For the modeling of the HE cells, we utilize the vertex model without any additional  
497 consideration. Although, as reported in one of our earlier works, the dynamics of the HE cells is  
498 regulated by the expression gradients of members of the planar cell polarity pathway, we do not  
499 take that detail into account here (Kumar et al., 2020). We do not expect the findings to change  
500 even if those details are incorporated into the model.

501 *Vertex model for LEC layer*

502 For the LEC layer, we extend the vertex model to incorporate the role of the Sqh, as observed in  
503 the experiments. We take into account the contractile activity of the Sqh in the form of active  
504 forces on the boundaries of the LEC cells in the direction normal to the cell membrane. The  
505 active force on the  $i^{\text{th}}$  vertex of the cell is:

$$\mathbf{f}_\alpha(i) = \mathcal{H}(\mathbf{M}_s(i))\mathbf{n}_i \quad (3)$$

506 where,  $\mathcal{H}$  is the Hill's function,  $\mathbf{M}_s$  is the level of Sqh in the cell and  $\mathbf{n}_i$  is the membrane inward  
507 normal at the  $i^{\text{th}}$  vertex. This nature of active forces has previously been used to model motile  
508 cells of amoeboid nature (Farutin et al., 2013). It has to be noted that due to the intrinsic nature  
509 of the active force, the total active forces and total torque due to the active force on the cell  
510 should vanish. That is:

$$\oint \mathbf{f}_\alpha dl = 0, \oint \mathbf{r} \times \mathbf{f}_\alpha dl = 0 \quad (4)$$

511 where, the integrals are along the cell perimeter. In order to ensure this, we add a correction to  
512 the active forces in the form:

$$\mathbf{f}_c(i) = \mathbf{f}_0 + f_t \mathbf{t}_i \quad (5)$$

## Larval epidermis drives *Drosophila* thorax closure

513 where  $\mathbf{t}_i$  is the unit vector tangent to the cell membrane. The exact values of the  $\mathbf{f}_0$  and  $f_t$  are  
514 calculated from equation (4). These corrections ensure that the total active force and torque on  
515 each cell vanish (Wu et al., 2016). For the LECs, we considered that the level of Sqh is equal in  
516 all the cells. To keep the computer simulation of the model, we apply active forces in a ramping  
517 manner starting from 0 to a fixed maximum value in linear increment over time.

### 518 **Boundary conditions**

519 Forces from the boundaries play a significant role in the overall dynamics of the epithelial tissues  
520 (Cochet-Escartin et al., 2014; Nikolić et al., 2006) and are so expected in thorax closure. In the  
521 simulation of thorax closure, we have considered all the boundaries to be stress-free. It needs to  
522 be pointed out that this boundary condition represents a simplification of the *in vivo* condition  
523 where the tissues and geometric features, such as the segment boundary, adjacent to the LEC or  
524 HE may present additional constraints to the cell dynamics.

### 525 **Simulation of different cases shown in Figure 5**

526 Figure 5 shows the results of vertex modeling of the thorax closure with the following cases:

- 527 **1.** The Wild-type case (Figure 5B) considers all the aforementioned model ingredients.
- 528 **2.** For the simulation of LEC layer dynamics with no Sqh (Figure 5C), we reduced the value of  
529 Sqh to  $1/10^{\text{th}}$  of the Wild type case.
- 530 **3.** For the simulation with no cell delamination (Figure 5D), the T2 transitions were not  
531 performed.
- 532 **4.** For the simulation with integrin loss (Figure 5E) the adhesion between the LECs and the HE  
533 cells was broken.

### 534 **Acknowledgment:**

535 We would like to thank Damein Brunner for *332.3Gal80*, Michael Galko for *A58-Gal4* and *UAS-*  
536 *nudsRed*, and Nick Brown for *mys-GFP* stocks, and Fumio Matsuzaki for the antibody (Lgl). We  
537 would also like to thank Richa Rikhy for her guidance in conducting Laser ablation experiments  
538 in IISER Pune, and Maithreyi Narasimha, TIFR Mumbai and Nick Brown, University of  
539 Cambridge for their inputs in our work. We further thank Suvimal Kumar Sindhu and Jonaki Sen

540 for their help in tissue cryo-sectioning.

541

542 **Funding information:**

543 This investigation was supported by a research grant from the CSIR New Delhi to PS. We also

544 like to thank CSIR and ICMR for financial support for SSP and RB, respectively.

545

546 **References**

547 **Aegerter-Wilmsen, T., Smith, A. C., Christen, A. J., Aegerter, C. M., Hafen, E. and Basler,**  
548 **K.** (2010). Exploring the effects of mechanical feedback on epithelial topology.  
549 *Development* **137**, 499–506.

550 **Agnès, F., Suzanne, M. and Noselli, S.** (1999). The *Drosophila* JNK pathway controls the  
551 morphogenesis of imaginal discs during metamorphosis. *Development*. **126**, 5453–5462.

552 **Alberts, B., Johnson, A., Lewis, J., Raff, M., Roberts, K. and Walter, P.** (2002). Fibroblasts  
553 and Their Transformations: The Connective-Tissue Cell Family. *Molecular Biology of*  
554 *the Cell, 4th Ed.* Garland Science.

555 **Ambrosini, A., Gracia, M., Proag, A., Rayer, M., Monier, B. and Suzanne, M.** (2017).  
556 Apoptotic forces in tissue morphogenesis. *Mech. Dev.* **144**, 33–42.

557 **Anderson, A. E. and Galko, M. J.** (2014). Rapid clearance of epigenetic protein reporters from  
558 wound edge cells in *Drosophila* larvae does not depend on the JNK or PDGFR/VEGFR  
559 signaling pathways. *Regeneration* **1**, 11–25.

560 **Arata, M., Sugimura, K. and Uemura, T.** (2017). Difference in Dachous Levels between  
561 Migrating Cells Coordinates the Direction of Collective Cell Migration. *Dev. Cell* **42**,  
562 479-497.e10.

563 **Aigouy, B., Farhadifar, R., Staple, D. B., Sagner, A., Röper, J. C., Jülicher, F., & Eaton, S.**  
564 (2010). Cell flow reorients the axis of planar polarity in the wing epithelium of  
565 *Drosophila*. *Cell* **142**,.

566 **Bardet, P.-L., Kolahgar, G., Mynett, A., Miguel-Aliaga, I., Briscoe, J., Meier, P. and**  
567 **Vincent, J.-P.** (2008). A fluorescent reporter of caspase activity for live imaging. *Proc.*  
568 *Natl. Acad. Sci. U. S. A.* **105**, 13901–13905.

569 **Beira, J. V. and Paro, R.** (2016). The legacy of *Drosophila* imaginal discs. *Chromosoma* **125**,  
570 573–592.

571 **Belacortu, Y. and Paricio, N.** (2011). *Drosophila* as a model of wound healing and tissue  
572 regeneration in vertebrates. *Dev. Dyn.* **240**, 2379–2404.

*Larval epidermis drives Drosophila thorax closure*

- 573 **Bi, D., Lopez, J. H., Schwarz, J. M. and Manning, M. L.** (2015). A density-independent  
574 rigidity transition in biological tissues. *Nat. Phys.* **11**, 1074–1079.
- 575 **Bischoff, M.** (2012). Lamellipodia-based migrations of larval epithelial cells are required for  
576 normal closure of the adult epidermis of *Drosophila*. *Dev. Biol.* **363**, 179–190.
- 577 **Cochet-Escartin, O., Ranft, J., Silberzan, P. and Marcq, P.** (2014). Border Forces and  
578 Friction Control Epithelial Closure Dynamics. *Biophys. J.* **106**, 65–73.
- 579 **Darby, I. A., Laverdet, B., Bonté, F. and Desmoulière, A.** (2014). Fibroblasts and  
580 myofibroblasts in wound healing. *Clin. Cosmet. Investig. Dermatol.* **7**, 301–311.
- 581 **Ducuing, A. and Vincent, S.** (2016). The actin cable is dispensable in directing dorsal closure  
582 dynamics but neutralizes mechanical stress to prevent scarring in the *Drosophila* embryo.  
583 *Nat. Cell Biol.* **18**, 1149–1160.
- 584 **Duffy, J. B.** (2002). GAL4 system in *Drosophila*: A fly geneticist’s swiss army knife. *genesis*  
585 **34**, 1–15.
- 586 **Eming, S. A., Krieg, T. and Davidson, J. M.** (2007). Inflammation in Wound Repair:  
587 Molecular and Cellular Mechanisms. *J. Invest. Dermatol.* **127**, 514–525.
- 588 **Fadul, J. and Rosenblatt, J.** (2018). The forces and fates of extruding cells. *Curr. Opin. Cell*  
589 *Biol.* **54**, 66–71.
- 590 **Farhadifar, R., Röper, J.-C., Aigouy, B., Eaton, S. and Jülicher, F.** (2007). The influence of  
591 cell mechanics, cell-cell interactions, and proliferation on epithelial packing. *Curr. Biol.*  
592 *CB* **17**, 2095–2104.
- 593 **Farutin, A., Rafai, S., Dysthe, D. K., Duperray, A., Peyla, P. and Misbah, C.** (2013).  
594 Amoeboid Swimming: A Generic Self-Propulsion of Cells in Fluids by Means of  
595 Membrane Deformations. *Phys. Rev. Lett.* **111**, 228102.
- 596 **Franke, J. D., Montague, R. A. and Kiehart, D. P.** (2005). Non muscle myosin II generates  
597 forces that transmit tension and drive contraction in multiple tissues during dorsal  
598 closure. *Curr. Biol. CB* **15**, 2208–2221.
- 599 **Fristrom, D. K. and Fristrom, J. W.** (1993). The metamorphic development of the adult  
600 epidermis. *The development of Drosophila melanogaster* **2**, 843-849
- 601 **Galko, M. J. and Krasnow, M. A.** (2004). Cellular and Genetic Analysis of Wound Healing in  
602 *Drosophila* Larvae. *PLOS Biol.* **2**, e239.
- 603 **Gelbart, M. A., He, B., Martin, A. C., Thiberge, S. Y., Wieschaus, E. F. and Kaschube, M.**  
604 (2012). Volume conservation principle involved in cell lengthening and nucleus  
605 movement during tissue morphogenesis. *Proc. Natl. Acad. Sci. U. S. A.* **109**, 19298–  
606 19303.

*Larval epidermis drives Drosophila thorax closure*

- 607 **Gorfinkiel, N.** (2016). From actomyosin oscillations to tissue-level deformations. *Dev. Dyn.*  
608 **245**, 268–275.
- 609 **Gurtner, G. C., Werner, S., Barrandon, Y. and Longaker, M. T.** (2008). Wound repair and  
610 regeneration. *Nature* **453**, 314–321.
- 611 **Gustafson, T.** (1963). Cellular mechanisms in the morphogenesis of the sea urchin embryo. Cell  
612 contacts within the ectoderm and between mesenchyme and ectoderm cells. *Exp. Cell*  
613 *Res.* **32**, 570–589.
- 614 **Harden, N.** (2002). Signaling pathways directing the movement and fusion of epithelial sheets:  
615 lessons from dorsal closure in *Drosophila*. *Differentiation* **70**, 181–203.
- 616 **Hay, B. A., Wolff, T. and Rubin, G. M.** (1994). Expression of baculovirus P35 prevents cell  
617 death in *Drosophila*. *Development* **120**, 2121–2129.
- 618 **Hayes, P. and Solon, J.** (2017). *Drosophila* dorsal closure: An orchestra of forces to zip shut the  
619 embryo. *Mech. Dev.* **144**, 2–10.
- 620 **Heisenberg, C.-P. and Bellaïche, Y.** (2013). Forces in Tissue Morphogenesis and Patterning.  
621 *Cell* **153**, 948–962.
- 622 **Jacinto, A., Woolner, S. and Martin, P.** (2002). Dynamic Analysis of Dorsal Closure in  
623 *Drosophila*: From Genetics to Cell Biology. *Dev. Cell* **3**, 9–19.
- 624 **Khan, Z., Wang, Y.-C., Wieschaus, E. F. and Kaschube, M.** (2014). Quantitative 4D analyses  
625 of epithelial folding during *Drosophila* gastrulation. *Development* **141**, 2895–2900.
- 626 **Kiehart, D. P., Galbraith, C. G., Edwards, K. A., Rickoll, W. L. and Montague, R. A.**  
627 (2000). Multiple forces contribute to cell sheet morphogenesis for dorsal closure in  
628 *Drosophila*. *J. Cell Biol.* **149**, 471–490.
- 629 **Kiehart, D. P., Crawford, J. M., Aristotelous, A., Venakides, S. and Edwards, G. S.** (2017).  
630 Cell Sheet Morphogenesis: Dorsal Closure in *Drosophila melanogaster* as a Model  
631 System. *Annu. Rev. Cell Dev. Biol.* **33**, 169–202.
- 632 **Kumar, A., Rizvi, M. S., Athilingam, T., Parihar, S. S. and Sinha, P.** (2020). Heterophilic  
633 cell-cell adhesion of atypical cadherins Fat and Dachous regulate epithelial cell size  
634 dynamics during *Drosophila* thorax morphogenesis. *Mol. Biol. Cell* **31**, 546–560.
- 635 **Levayer, R., Dupont, C. and Moreno, E.** (2016). Tissue Crowding Induces Caspase-Dependent  
636 Competition for Space. *Curr. Biol. CB* **26**, 670–677.
- 637 **Li, B. and Wang, J. H.-C.** (2011). Fibroblasts and Myofibroblasts in Wound Healing: Force  
638 Generation and Measurement. *J. Tissue Viability* **20**, 108–120.

*Larval epidermis drives Drosophila thorax closure*

- 639 **Lin, S.-Z., Li, B., Lan, G. and Feng, X.-Q.** (2017). Activation and synchronization of the  
640 oscillatory morphodynamics in multicellular monolayer. *Proc. Natl. Acad. Sci. U. S. A.*  
641 **114**, 8157–8162.
- 642 **Marinari, E., Mehonic, A., Curran, S., Gale, J., Duke, T. and Baum, B.** (2012). Live-cell  
643 delamination counterbalances epithelial growth to limit tissue overcrowding. *Nature* **484**,  
644 542–545.
- 645 **Martin, P.** (1997). Wound Healing--Aiming for Perfect Skin Regeneration. *Science* **276**, 75–81.
- 646 **Martin, P. and Lewis, J.** (1992). Actin cables and epidermal movement in embryonic wound  
647 healing. *Nature* **360**, 179–183.
- 648 **Martín-Blanco, E. and Knust, E.** (2001). Epithelial morphogenesis: filopodia at work. *Curr.*  
649 *Biol. CB* **11**, R28-31.
- 650 **Martín-Blanco, E., Pastor-Pareja, J. C. and García-Bellido, A.** (2000). JNK and  
651 decapentaplegic signaling control adhesiveness and cytoskeleton dynamics during thorax  
652 closure in *Drosophila*. *Proc. Natl. Acad. Sci. U. S. A.* **97**, 7888–7893.
- 653 **Molè, M. A., Galea, G. L., Rolo, A., Weberling, A., Nychyk, O., De Castro, S. C., Savery,**  
654 **D., Fässler, R., Ybot-González, P., Greene, N. D. E., et al.** (2020). Integrin-Mediated  
655 Focal Anchorage Drives Epithelial Zippering during Mouse Neural Tube Closure. *Dev.*  
656 *Cell* **52**, 321-334.e6.
- 657 **Morin, X., Daneman, R., Zavortink, M. and Chia, W.** (2001). A protein trap strategy to detect  
658 GFP-tagged proteins expressed from their endogenous loci in *Drosophila*. *Proc. Natl.*  
659 *Acad. Sci. U. S. A.* **98**, 15050–15055.
- 660 **Muliyil, S., Krishnakumar, P. and Narasimha, M.** (2011). Spatial, temporal and molecular  
661 hierarchies in the link between death, delamination and dorsal closure. *Development* **138**,  
662 3043–3054.
- 663 **Nagata, S.** (2018). Apoptosis and Clearance of Apoptotic Cells. *Annu. Rev. Immunol.* **36**, 489–  
664 517.
- 665 **Narasimha, M. and Brown, N. H.** (2004). Novel functions for integrins in epithelial  
666 morphogenesis. *Curr. Biol. CB* **14**, 381–385.
- 667 **Narasimha, M., & Brown, N. H.** (2013). Integrins and associated proteins in *Drosophila*  
668 development. In *Madame Curie Bioscience Database [Internet]*. Landes Bioscience.
- 669 **Nikolić, D. L., Boettiger, A. N., Bar-Sagi, D., Carbeck, J. D. and Shvartsman, S. Y.** (2006).  
670 Role of boundary conditions in an experimental model of epithelial wound healing. *Am.*  
671 *J. Physiol. Cell Physiol.* **291**, C68-75.



*Larval epidermis drives Drosophila thorax closure*

- 672 **Ninov, N., Chiarelli, D. A. and Martín-Blanco, E.** (2007). Extrinsic and intrinsic mechanisms  
673 directing epithelial cell sheet replacement during *Drosophila* metamorphosis.  
674 *Development* **134**, 367–379.
- 675 **Norden, C.** (2017). Pseudo-stratified epithelia – cell biology, diversity and roles in organ  
676 formation at a glance. *J. Cell Sci.* **130**, 1859–1863.
- 677 **Parsons, J. T., Horwitz, A. R. and Schwartz, M. A.** (2010). Cell adhesion: integrating  
678 cytoskeletal dynamics and cellular tension. *Nat. Rev. Mol. Cell Biol.* **11**, 633–643.
- 679 **Pasakarnis, L., Frei, E., Caussinus, E., Affolter, M. and Brunner, D.** (2016). Amnioserosa  
680 cell constriction but not epidermal actin cable tension autonomously drives dorsal  
681 closure. *Nat. Cell Biol.* **18**, 1161–1172.
- 682 **Pastor-Pareja, J. C., Grawe, F., Martín-Blanco, E. and García-Bellido, A.** (2004). Invasive  
683 Cell Behavior during *Drosophila* Imaginal Disc Eversion Is Mediated by the JNK  
684 Signaling Cascade. *Dev. Cell* **7**, 387–399.
- 685 **Prat-Rojo, C., Pouille, P.-A., Buceta, J. and Martín-Blanco, E.** (2020). Mechanical  
686 coordination is sufficient to promote tissue replacement during metamorphosis in  
687 *Drosophila*. *EMBO J.* **39**, e103594.
- 688 **Saias, L., Swoger, J., D’Angelo, A., Hayes, P., Colombelli, J., Sharpe, J., Salbreux, G. and**  
689 **Solon, J.** (2015). Decrease in Cell Volume Generates Contractile Forces Driving Dorsal  
690 Closure. *Dev. Cell* **33**, 611–621.
- 691 **Shaw, T. J. and Martin, P.** (2009). Wound repair at a glance. *J. Cell Sci.* **122**, 3209–3213.
- 692 **Singh, R., Letai, A. and Sarosiek, K.** (2019). Regulation of apoptosis in health and disease: the  
693 balancing act of BCL-2 family proteins. *Nat. Rev. Mol. Cell Biol.* **20**, 175–193.
- 694 **Sisson, J. C., Field, C., Ventura, R., Royou, A. and Sullivan, W.** (2000). Lava Lamp, a Novel  
695 Peripheral Golgi Protein, Is Required for *Drosophila melanogaster* Cellularization. *J.*  
696 *Cell Biol.* **151**, 905–918.
- 697 **Solon, J., Kaya-Copur, A., Colombelli, J. and Brunner, D.** (2009). Pulsed forces timed by a  
698 ratchet-like mechanism drive directed tissue movement during dorsal closure. *Cell* **137**,  
699 1331–1342.
- 700 **Sun, Z., Guo, S. S. and Fässler, R.** (2016). Integrin-mediated mechanotransduction. *J. Cell*  
701 *Biol.* **215**, 445–456.
- 702 **Suzanne, M. and Steller, H.** (2013). Shaping organisms with apoptosis. *Cell Death Differ.* **20**,  
703 669–675.
- 704 **Teng, X. and Toyama, Y.** (2011). Apoptotic force: Active mechanical function of cell death  
705 during morphogenesis. *Dev. Growth Differ.* **53**, 269–276.

*Larval epidermis drives Drosophila thorax closure*

- 706 **Teng, X., Qin, L., Borgne, R. L. and Toyama, Y.** (2017). Remodeling of adhesion and  
707 modulation of mechanical tensile forces during apoptosis in *Drosophila* epithelium.  
708 *Development* **144**, 95–105.
- 709 **Toyama, Y., Peralta, X. G., Wells, A. R., Kiehart, D. P. and Edwards, G. S.** (2008).  
710 Apoptotic force and tissue dynamics during *Drosophila* embryogenesis. *Science* **321**,  
711 1683–1686.
- 712 **Truman, J. W. and Riddiford, L. M.** (2019). The evolution of insect metamorphosis: a  
713 developmental and endocrine view. *Philos. Trans. R. Soc. B Biol. Sci.* **374**, 20190070.
- 714 **Usui, K. and Simpson, P.** (2000). Cellular Basis of the Dynamic Behavior of the Imaginal  
715 Thoracic Discs during *Drosophila* Metamorphosis. *Dev. Biol.* **225**, 13–25.
- 716 **Vereshchagina, N., Bennett, D., Szöör, B., Kirchner, J., Gross, S., Vissi, E., White-Cooper,**  
717 **H. and Alpey, L.** (2004). The Essential Role of PP1 $\beta$  in *Drosophila* Is to Regulate Non  
718 muscle myosin. *Mol. Biol. Cell* **15**, 4395–4405.
- 719 **Williams-Masson, E. M., Malik, A. N. and Hardin, J.** (1997). An actin-mediated two-step  
720 mechanism is required for ventral enclosure of the *C. elegans* hypodermis. *Development*  
721 **124**, 2889–2901.
- 722 **Wu, H., Farutin, A., Hu, W.-F., Thiébaud, M., Rafäi, S., Peyla, P., Lai, M.-C. and Misbah,**  
723 **C.** (2016). Amoeboid swimming in a channel. *Soft Matter* **12**, 7470–7484.
- 724 **Mao, Y., Tournier, A. L., Bates, P. A., Gale, J. E., Tapon, N., & Thompson, B. J.** (2011).  
725 Planar polarization of the atypical myosin Dachs orients cell divisions in  
726 *Drosophila*. *Genes Dev.*, **25**(2), 131-136.
- 727 **Yang, J. and Liu, Y.** (2001). Dissection of key events in tubular epithelial to myofibroblast  
728 transition and its implications in renal interstitial fibrosis. *Am. J. Pathol.* **159**, 1465–1475.
- 729 **Young, P. E., Richman, A. M., Ketchum, A. S. and Kiehart, D. P.** (1993). Morphogenesis in  
730 *Drosophila* requires non-muscle myosin heavy chain function. *Genes Dev.* **7**, 29–41.
- 731 **Zeitlinger, J. and Bohmann, D.** (1999). Thorax closure in *Drosophila*: involvement of Fos and  
732 the JNK pathway. *Development.* **126**, 3947–3956.

733

734 **Figure legends:**

735 **Figure 1. LEC layer dynamics during thorax closure**

*Larval epidermis drives Drosophila thorax closure*

736 **(A-A')** HE and LEC layer during the course of thorax closure: *puc-lacZ* ( $\beta$ -gal, green) mark the  
737 leading edge; F-actin (grey), and nuclei (red) (A). (A') Magnified box of (A) reveals  
738 lamellipodia (blue arrowhead) and filopodia (red arrowhead). Scale bar: 50  $\mu$ m.

739 **(B-C)** Snapshots (from left panel of Video 1) for the progression of thorax closure; the edges of  
740 HE (green outlined) and LEC layer (red outline) are also shown separately in (C). Scale bar: 100  
741  $\mu$ m.

742 **(D)** Change in surface area of LEC layer before and during the course of thorax closure  
743 (quantified from left panel in Video 1) (N=1).

744 **(E)** Increase in the number of nuclei—to predict overcrowding—in the medial region of LEC  
745 layer in T2 (Box 1 and 2) segment as compared to T3 segment (Box 3) (see Figure1B for boxes  
746 location) (N =2; Mean  $\pm$  SD).

747 **(F-G)** Tracks of cell movement—as traced from their nuclei (from right panel of Video 1)—in  
748 the LEC layer before (0-4 hrs, blue, F) and during (4-6 hrs, green, G) thorax closure.

749 **(H-I)** Cryo-cross sections of T2 segment at 4:30 hrs (H) and 5:30 hrs (I) APF, stained for actin  
750 (grey) and LECs (red nucleus) (yellow dotted outlined), the HE (yellow arrows) and  
751 delaminating nuclei (yellow star) (N =number or samples tested), Scale bar: 50  $\mu$ m.

752 **(J-L)** Cell height of 3:30 hrs (early) (J) and 5:30 hrs (late) (K) of LEC layer (yellow dotted  
753 outline), with delaminated cells (yellow stars); and their respective quantification (L) (N=3 for  
754 each of the stages with 10 independent measurements from each sample, Student's t-test,  
755 \*\*\*\*p<0.0001, Mean $\pm$  SEM). Scale bar: 5  $\mu$ m.

756 **(M)** Cartoon representation of the dynamic changes in the LEC layer (blue-green)—from a  
757 stretched to a crowded state followed by the cell extrusion—parallel to HE migration (brown)  
758 during thorax closure.

759 **Figure 2: Cell delamination and death in LEC layer during thorax closure**

*Larval epidermis drives Drosophila thorax closure*

760 (A) Snapshots of Lachesin-GFP marked cell outline of LECs (also see Video 2) showing cells  
761 undergoing apical constriction (yellow arrowhead) and delamination (red arrowhead) (Scale bar:  
762 25  $\mu\text{m}$ ).

763 (B) Top and X-Z view for controls compared to *p35* overexpression using *A58-Gal4* (also see  
764 Figure S1D). Outlines of HE (yellow dotted lines) and LEC layer (white dotted lines and  
765 counterstained for actin (red, shown only in lower panel) to mark cell cytoskeleton and muscles.  
766 Large masses of LECs shown as (yellow stars) (Scale bar: 50  $\mu\text{m}$ ).

767 (C) Adult thorax (upper panels) and their respective fluorescent images (lower panels) from the  
768 above case (B). Cleft thoraces phenotypes following *p35* overexpression (blue arrowheads in  
769 upper panel) and red arrowheads mark persistence of GFP-marked LECs in adults (lower panel)  
770 (Scale bar: 200  $\mu\text{m}$ ).

771 (D) Inter-HE distances in case of *A58>GFP* (control, green) and their respective *p35*  
772 overexpression (*A58>GFP; p35*, red) (N=3 for each case, Mean  $\pm$  SEM, two-way ANOVA was  
773 performed, \*\*\*\* p value: <0.0001).

774 (E) Cartoon representation of cross-sectional view of the control and those displaying *p35* over-  
775 expressions at 6 hrs APF.

776 **Figure 3. Non-muscle myosin II in LEC layer drives thorax closure.**

777 (A-B) Time-lapse snapshots of thorax closure in *pnr>GFP* (left panel, Video 4) (A) and  
778 following laser ablation (B) (Video 3). Yellow box in (B) represents the region of interest (ROI)  
779 for laser ablation. Red star marks the tips of the contralateral HE (Scale bar: A-200  $\mu\text{m}$  and B-50  
780  $\mu\text{m}$ ).

781 (C) Graphical plot to show the increased inter-HE distances following laser ablation (B) during  
782 thorax closure.

783 (D-D''') Sqh expression in the migrating HE and LEC layer, counterstained with actin (red). The  
784 blue boxed area of (D) is magnified (D') to display the patterns of enrichments of Sqh-GFP (D'')  
785 and actin (D''') in the LEC layer (Scale bar: 50  $\mu\text{m}$ ).

*Larval epidermis drives Drosophila thorax closure*

786 **(E-G)** Whole-mounts preparation at 6 hrs APF for control (+, left panel) and their respective *sqh*  
787 knockdown (*sqh*-RNAi, right panel) using various Gal4s (see Figure S1B-D); yellow dotted lines  
788 represent the edges of HE that failed to zipper (Scale bar: 50  $\mu$ m).

789 **(H)** Deviation of inter-HE separations at specific time points between control and *sqh*  
790 knockdown in E-G (see Video 5 with their respective panels in Video 4) (N =4; Mean  $\pm$  SEM,  
791 ANCOVA test was performed to compare the three linear regression models fits to the 3 cases;  
792 \*\*\*, p values: <0.001).

793 **Figure 4: Integrin- $\beta$ PS (Mys) is essential for maintaining HE-LEC contact as well as LEC**  
794 **integrity**

795 **(A)** Cartoon representation to check Mys (Integrin  $\beta$ PS1) localization in both the tissues (2 and  
796 3) and at the contact points (1, X-Z view) (Scale bar: 50  $\mu$ m).

797 **(B)** Mys-GFP localization (green) in the HE (magnified further in box 2), LEC (magnified  
798 further in box 3) and counterstained for Lgl (red). Broken yellow line marked as 1 to show the  
799 X-Z section for LEC-HE contact point and Y-Z view for box 2 and 3 were shown below for Mys  
800 localization with respective cartoon representation in (B) (Scale bar: A: 50  $\mu$ m and Box 2 and 3:  
801 25  $\mu$ m).

802 **(C-E)** Pupal whole mounts stained for actin (red) or nucleus (red): *mys*-knockdown using  
803 different Gal4s (see Figure S1B-D). The outlines for HE (cyan) and the LEC (yellow) are shown  
804 for their detachment (Scale bar: 50  $\mu$ m) (also see Video 6).

805 **(F-H)** Eclosed adults at lower temperature from C-E (18°C). Scale bar: 200  $\mu$ m.

806 **(I)** Deviation of HE separations at specific time points between control and *mys* knockdown (N =  
807 4; Mean  $\pm$  SEM, ANCOVA test was performed to compare the three linear regression models  
808 fits to the 3 cases; \*\*\*, p values: <0.001).

809 **Figure 5: Mathematical modelling of LEC dynamics.**

*Larval epidermis drives Drosophila thorax closure*

810 **(A)** Energy functional describing the passive response of the epithelial tissue with contributions  
811 from cell elasticity (in red), actomyosin contraction (in blue), and cell-cell adhesion (in cyan).  
812 *Sqh* localization at the cell membrane is considered in the form of active forces (in green).

813 **(B-D)** Three snapshots showing the cell geometries in the initial, intermediate and late stages of  
814 thorax closure in wild type scenario. Same snapshots for (C) in the absence of active force,  
815 analogous to *sqh-RNAi*, and (D) when the cell delamination is blocked, and (E) when integrin is  
816 knockdown.

817

818 **Figure 6: LEC layer generate pull force during thorax closure**

819 Graphical summary of the LEC layer (green) dynamic during thorax closure. LEC layer displays  
820 two different force generating mechanisms: a) via virtue of their enriched actomyosin network  
821 that allow cells to undergo active contraction (green arrow), and b) crowding induced  
822 delamination (rosette yellow cells) (orange arrow), together providing a pull force that drags the  
823 above HE to come close at the body midline.

824 Further, LEC layer and HE edge cells are indirectly connected via integrin-based connections  
825 (*Mys-Scb* heterodimer, green), besides LECs displaying integrin-enrichment at the sub-apical  
826 junctions, that allow relay of the LECs-forces to the HE tissues and stability to the LEC layer  
827 during the contraction phase.

828 **Supplementary Figure Legends:**

829 **Supplementary Figure 1: HE zippering event and the tissue-specific Gal4s used in current**  
830 **study**

831 **(A)** Contralateral HEs, undergoing fusion (blue arrow), with LEC layer, marked for actin (grey)  
832 at late stages of thorax closure (i.e. 5:00, 5:15, 5:30, and 6:00 hrs APF). Scale Bar: 50  $\mu$ m.

833 **(B-D)** Domains of expression of *nls-GFP* driven by *pnr-Gal4* (B); *332.3Gal80*; *pnr-Gal4* (C) and  
834 *A58-Gal4* (D). *332.3Gal80* suppresses the expression of *pnr* in LECs. Cartoon represent (column  
835 1), actual view in pupae (column 2) and in dissected HE and LEC layer (column 3) with their

*Larval epidermis drives Drosophila thorax closure*

836 eclosed adults (column 4) (Scale bars: pupae: 500  $\mu\text{m}$ , tissue mounts: 50  $\mu\text{m}$  and adults: 200  
837  $\mu\text{m}$ ).

838 **Supplementary Figure 2: LECs shows delamination and early caspase activation**

839 **(A-A')** Whole mount preparation of Spider-GFP marked LECs that shows the presence of  
840 delaminating cells—marked by their small apical sizes.

841 **(B)** X-Z view of LECs (*pnr>GFP*) to show delaminated cells (blue arrow) at 5:30 hrs APF.  
842 Scale bar: 25  $\mu\text{m}$ .

843 **(C)** Apoliner expression (green nuclei) before (2 hrs APF) and during (4 and 5 hrs APF) thorax  
844 closure. Boxed area from each image are shown at a higher magnification in the lower panel  
845 (Scale bar: upper panel: 100  $\mu\text{m}$ , lower panel: 50  $\mu\text{m}$ ).

846 **(D)** Loss of cells—counted using number of nucleus—in LEC layer (from T2 segment) during  
847 the thorax closure (N=2, Mean  $\pm$  SEM).

848 **Supplementary Figure 3: p35 overexpression spanning LECs impediment the process of**  
849 **HE migration and fusion.**

850 **A)** Comparison of the X-Z view for the *pnr-Gal4* driven p35 overexpression (lower panel) with  
851 respect to its control (upper panel), counter stained for actin (red).

852 **(B)** Adult thorax (upper panels) and their respective fluorescent images (lower panels) from the  
853 above cases. Cleft thoraces phenotypes following *p35* overexpression (blue arrowheads in upper  
854 panel) and red arrowheads mark persistence of GFP-marked LECs in adults (lower panel) (Scale  
855 bar: 200  $\mu\text{m}$ ).

856 **(C)** Inter-HE distances in case of *pnr-Gal4* and their respective *p35* overexpression (N=3 for  
857 each case, Mean  $\pm$  SEM, two-way ANOVA analysis was performed with \*\*\*\* p value:<0.0001).

858 **(D)** Comparison of the X-Z view for the *332.3Gal80; pnr-Gal4* driven p35 overexpression  
859 (lower panel) with respect to its control (upper panel), counter stained for actin (red).

*Larval epidermis drives Drosophila thorax closure*

860 **Supplementary Figure 4: *scab*,  $\alpha$ -PS3 integrin, cooperates with *mys* during the process of**  
861 **thorax closure**

862 **(A)** Screening for the candidate integrin heterodimer involved during thorax closure. In case of  
863 knockdown of  $\beta$ PS1 (*mys*) and  $\alpha$ PS3 (*scb*) results in no adults whereas in rest of cases eclosed  
864 adults are without any thorax defect. Scale bar: 200 $\mu$ m.

865 **(B-C)** Time-lapse snapshots at different time intervals of thorax closure where  $\alpha$ PS3 (*scab*) is  
866 knocked down using *pnr-Gal4* (E) and *A58-Gal4* (F) (lower panels) as compared to their  
867 respective controls (upper panels). Heminotal position in each case is marked in red star.

868 **Video Legends: (see supplementary information)**

869 **Video 1\_Live imaging of LECs and HE:** Left panel showing dual tissue live-imaging during  
870 early, mid and late stages of HE migration and finally fusion, whereas, right panel shows the  
871 LECs nuclear migration tracks before and during thorax closure.

872 **Video 2\_Apical cell constriction and delamination in LEC layer:** Lachesin-GFP marked  
873 LECs boundaries showing apical constriction (yellow) and delamination (red).

874 **Video 3\_Laser ablation of LEC layer:** *pnr>GFP* staged pupae showing events before and after  
875 the laser ablation (red arrow).

876 **Video 4\_Domains of Gal4 driver expression:** Controls used for live imaging to understand the  
877 process of thorax closure, *pnr>GFP* (left panel), *A58-GFP* (middle panel) and *332.3Gal80;*  
878 *pnr>GFP* (right panel) are used in this study.

879 **Video 5\_Tissue-specific *sqh* knockdown:** Live imaging of pupae when *sqh* is knockdown using  
880 different Gal4 mentioned above: that is, *pnr>GFP; sqh-RNAi* (left panel), *A58-GFP; sqh-RNAi*  
881 (middle panel) and *332.3Gal80; pnr>GFP; sqh-RNAi* (right panel).

882 **Video 6\_Tissue specific *mys* knockdown:** Live imaging of pupae when *mys* is knockdown  
883 using different Gal4 mentioned above: that is, *pnr>GFP; mys-RNAi* (left panel), *A58-GFP; mys-*  
884 *RNAi* (middle panel) and *332.3Gal80; pnr>GFP; mys-RNAi* (right panel).



*Larval epidermis drives Drosophila thorax closure*

885 **Video 7\_Mathematical simulation of various LEC parameters during thorax closure:**  
886 Visualization of thorax closure when all LEC parameters, identified in this study, are considered  
887 (Wild-type, first panel), when non-muscle myosin-II component is absent (second panel), when  
888 delamination is absent (third panel), and when integrin adhesions between the two-tissue  
889 interface are absent (fourth panel).

Figure 1

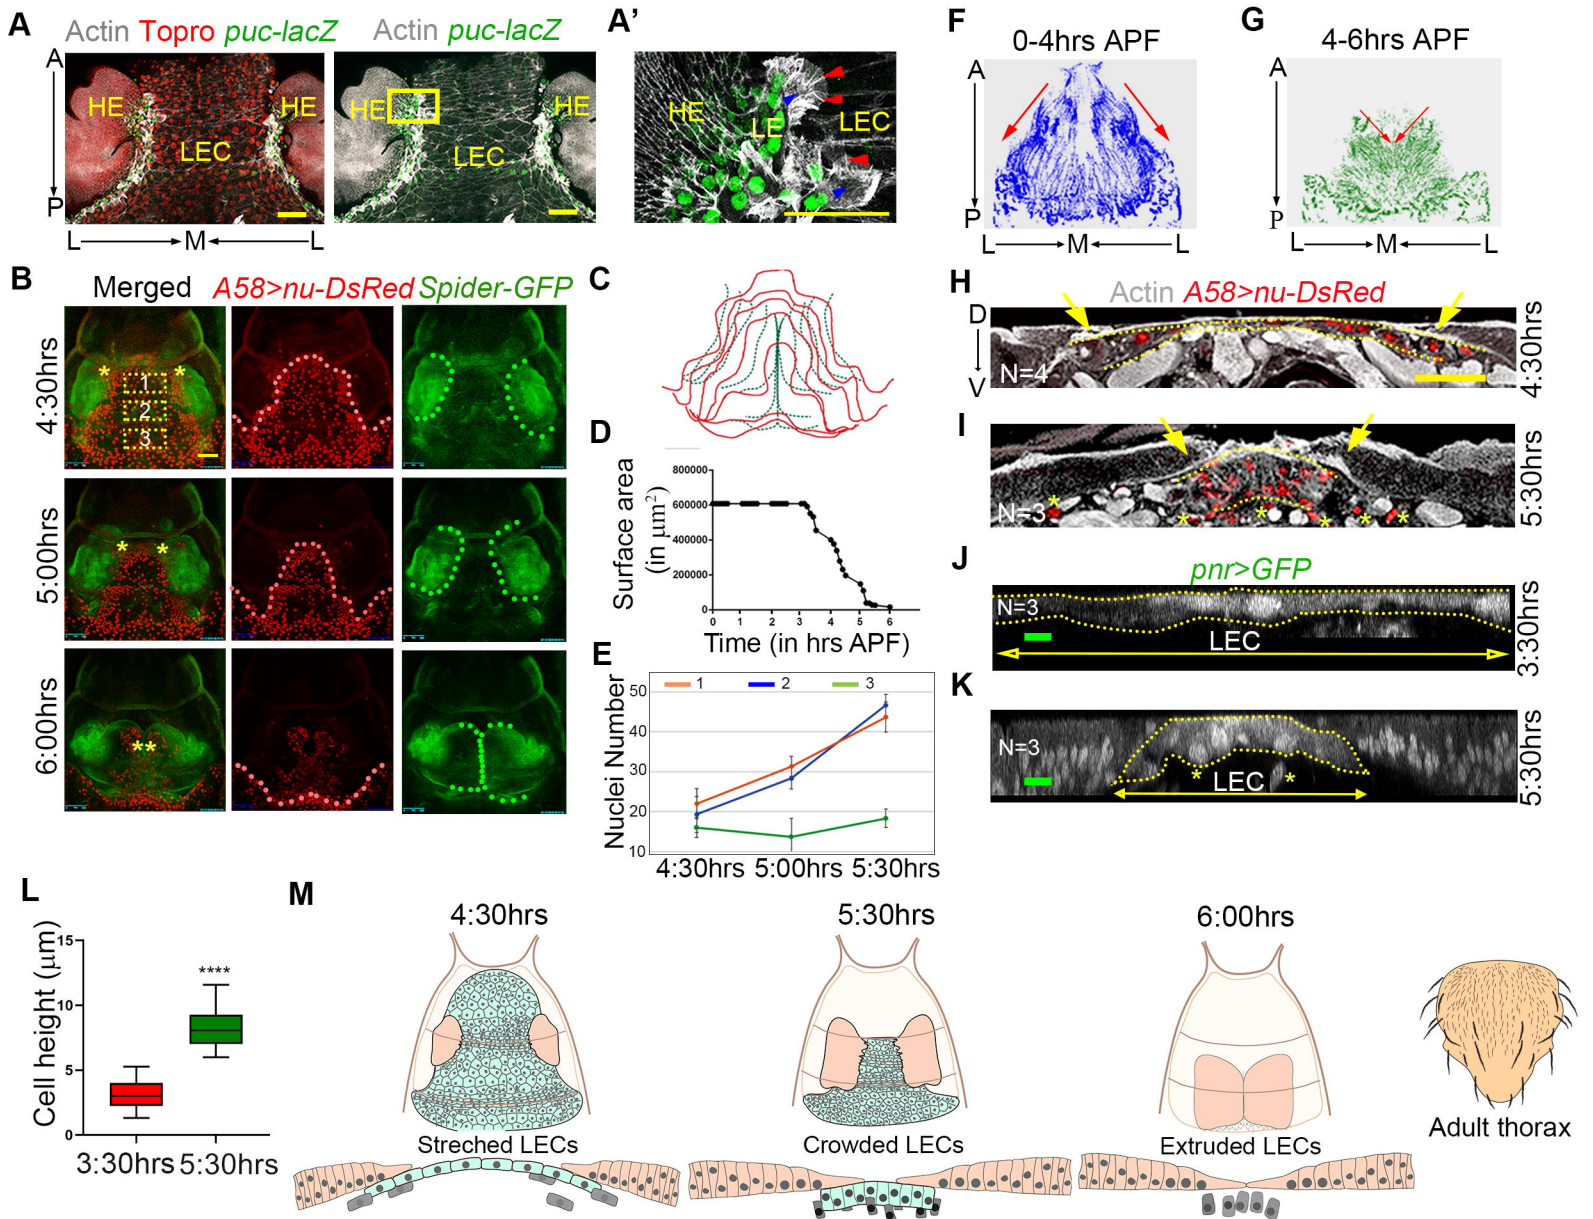

## Figure 2

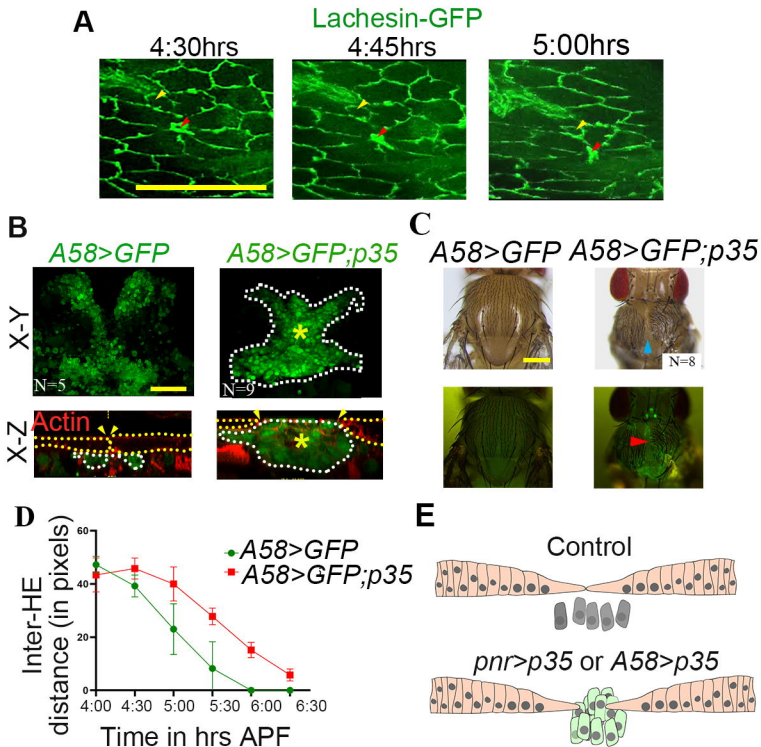

**Figure 3**

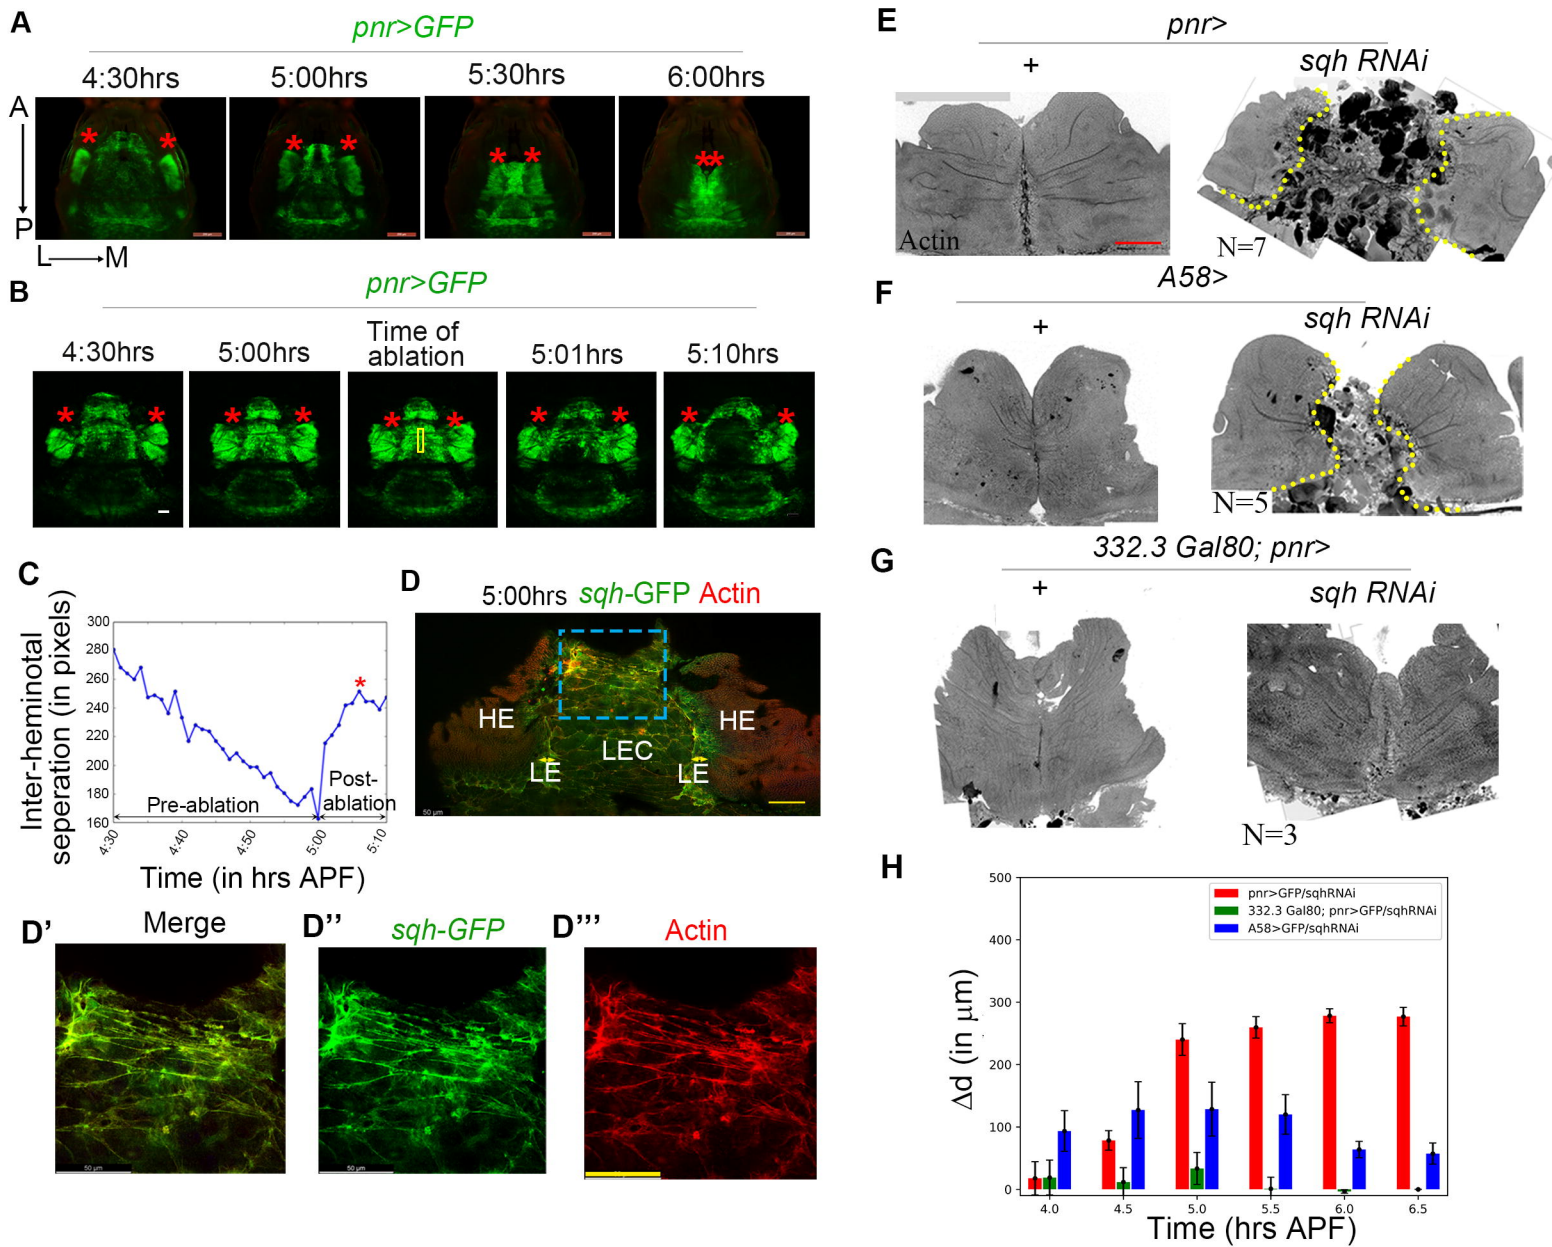

Figure 4

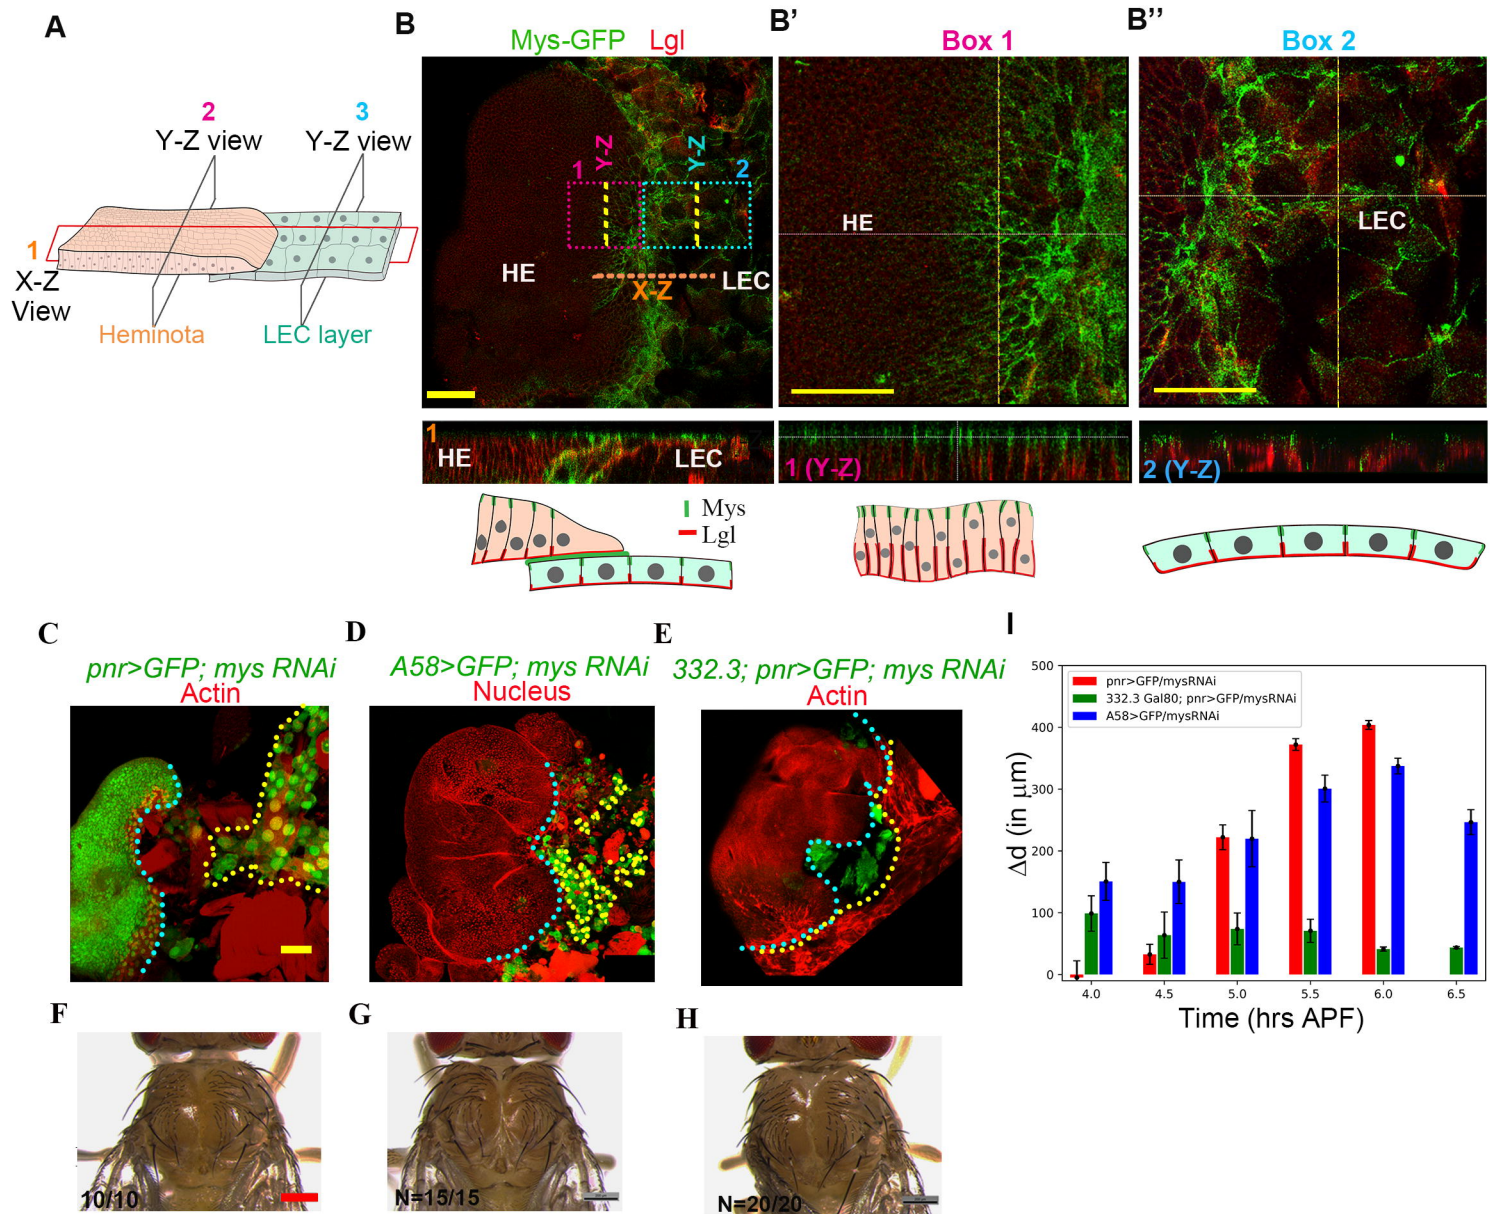

Figure 5

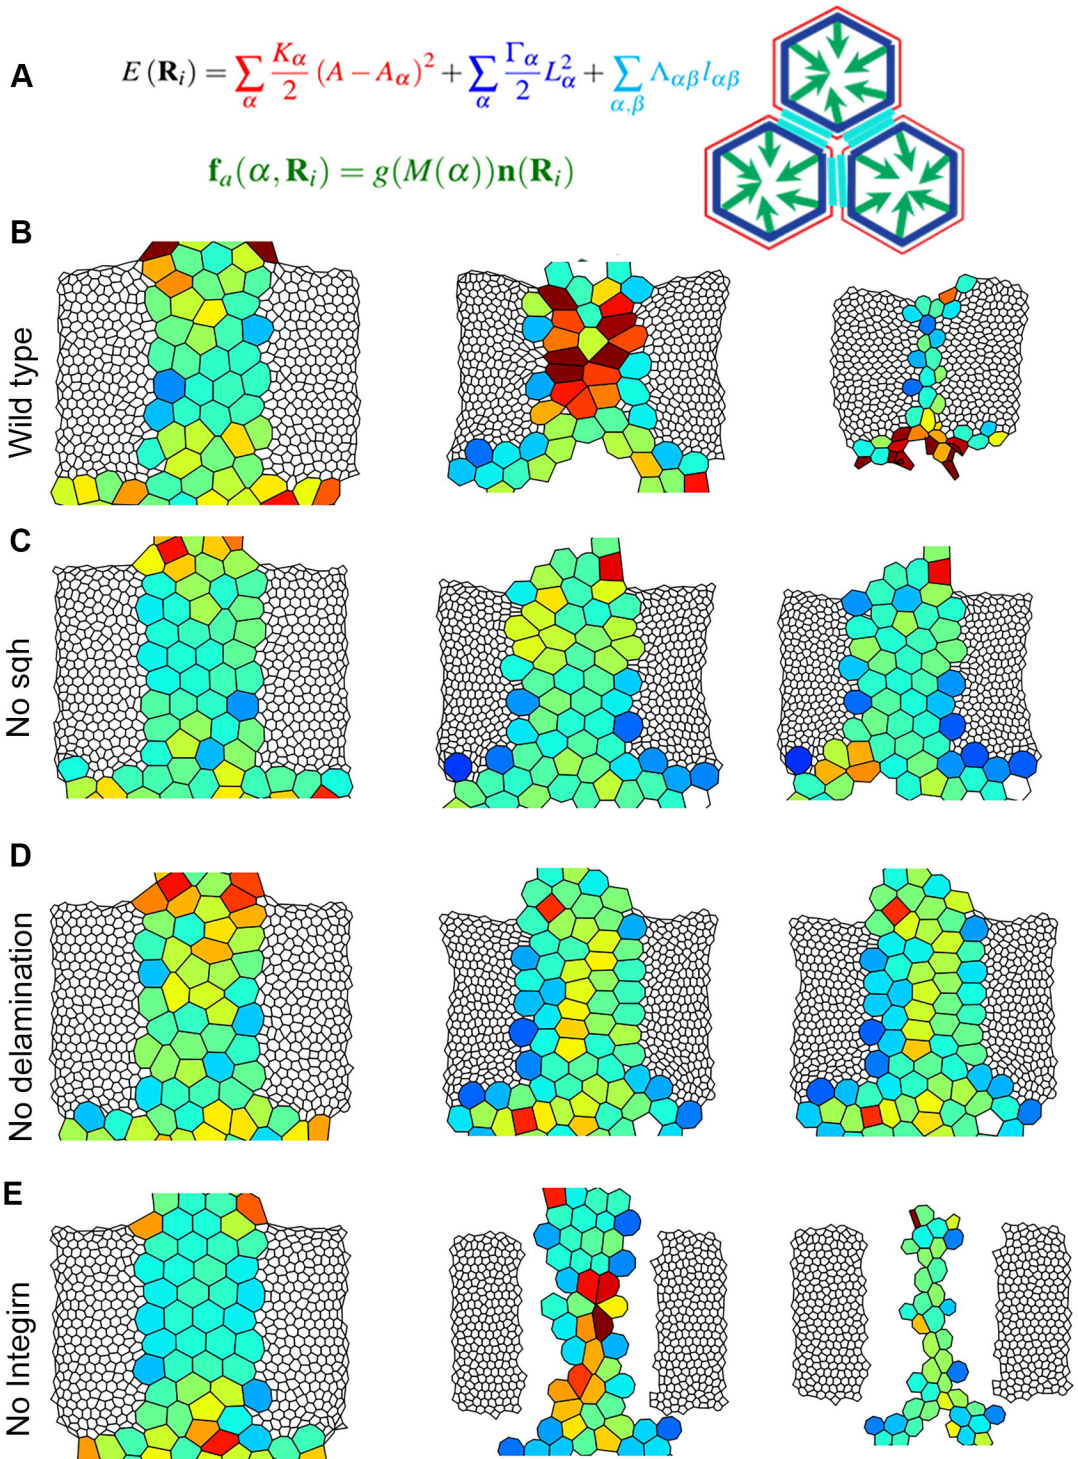

# Figure 6

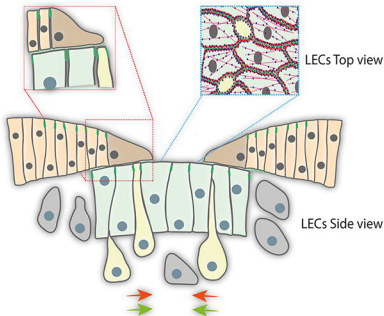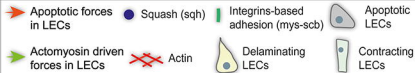

# Supplementary Figure 1

**A**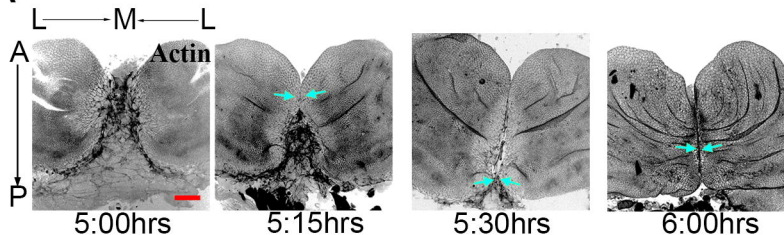**B** *pnr*>*GFP* (Both HE and LEC layer driver)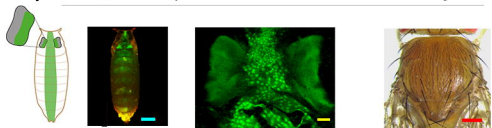**C** *332.3 Gal80; pnr*>*GFP* (HE driver)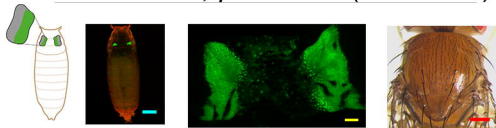**D** *A58*>*GFP* (LEC layer driver)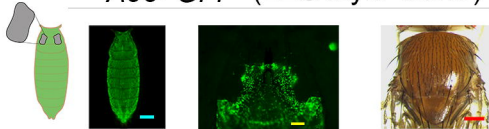



## Supplementary Figure 2

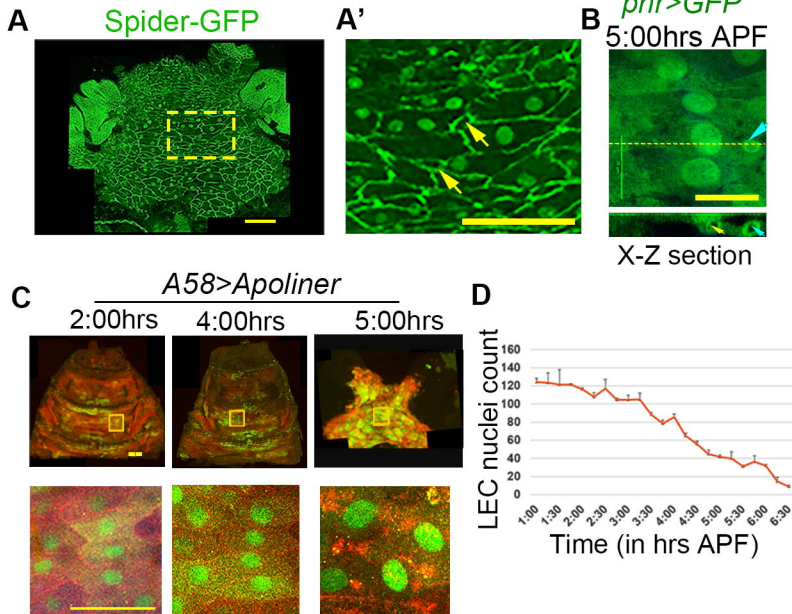

# Supplementary Figure 3

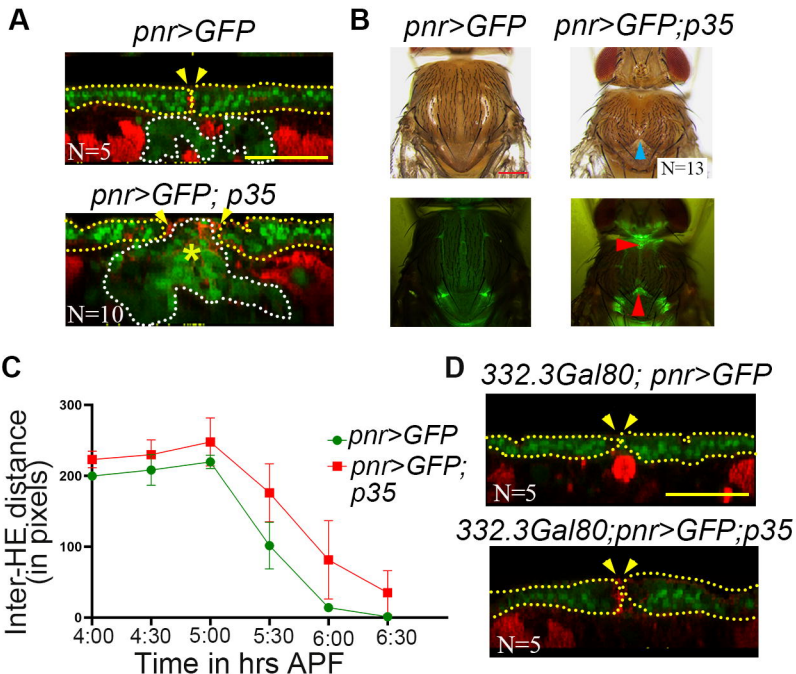

## Supplementary Figure 4

**A**

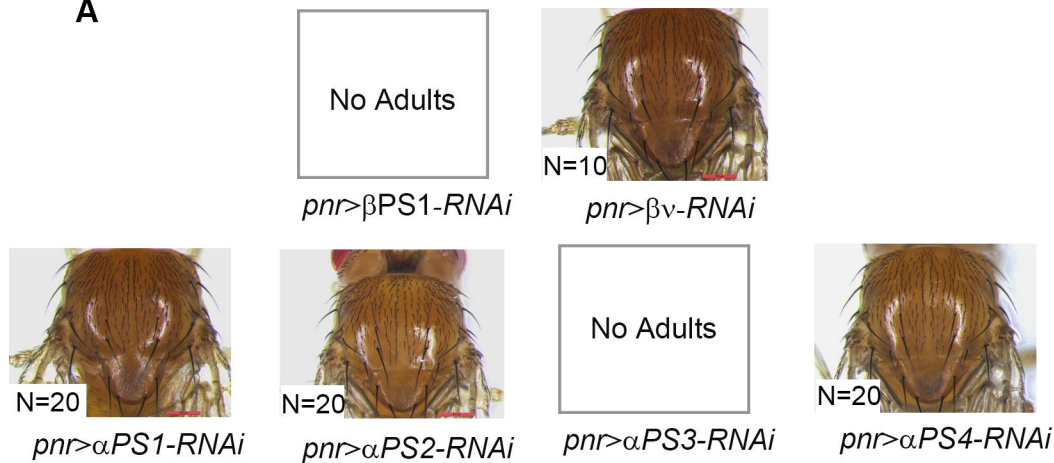

**B**

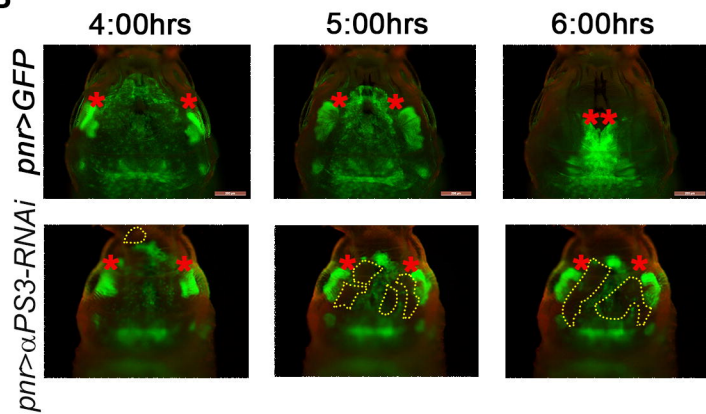

**C**

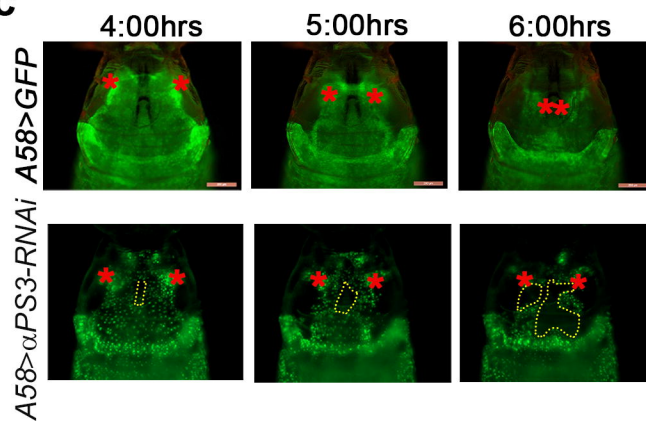

Source: https://www.biorxiv.org/content/10.1101/2020.09.22.304451v1.full.pdf
